1 **Cell-Cell Adhesion During Nephron Development Is Driven by Wnt/PCP Formin**  
2 **Daam1**

3  
4 Vanja Krneta-Stankic<sup>1,2</sup>, Mark Corkins<sup>2</sup>, Adriana Paulucci-Holthausen<sup>3</sup>, Malgorzata Kloc<sup>3,4</sup>,  
5 Andrew Gladden<sup>1,3,5</sup>, Rachel Miller<sup>1,2,3,6</sup>, \*

6  
7 <sup>1</sup>MD Anderson Cancer Center UTHealth Graduate School of Biomedical Sciences, Program in  
8 Genes and Development, Houston, TX, USA

9 <sup>2</sup>Department of Pediatrics, Pediatric Research Center, UTHealth McGovern Medical School,  
10 Houston, TX, USA

11 <sup>3</sup>Department of Genetics, University of Texas MD Anderson Cancer Center, Houston, TX, USA

12 <sup>4</sup>Houston Methodist Hospital Research Institute, Houston, TX, USA

13 <sup>5</sup>Department of Pathology and Laboratory Medicine, University of North Carolina, Chapel Hill,  
14 NC, USA

15 <sup>6</sup>MD Anderson Cancer Center UTHealth Graduate School of Biomedical Sciences, Program in  
16 Biochemistry and Cell Biology, Houston, TX, USA

17 \*Correspondence: Rachel.K.Miller@uth.tmc.edu  
18

19 **SUMMARY**

20 E-cadherin junctions facilitate the assembly and disassembly of cell-cell contacts that drive  
21 development and homeostasis of epithelial tissues. The stability of E-cadherin-based junctions  
22 highly depends on their attachment to the actin cytoskeleton, but little is known about how the  
23 assembly of junctional actin filaments is regulated. Formins are a conserved group of proteins  
24 responsible for the formation and elongation of filamentous actin (F-actin). In this study, using  
25 *Xenopus* embryonic kidney and Madin-Darby canine kidney (MDCK) cells, we investigate the  
26 role of the Wnt/ planar cell polarity (PCP) formin protein Daam1 (Dishevelled-associated  
27 activator of morphogenesis 1) in regulating E-cadherin based intercellular adhesion. Using live  
28 imaging we show that Daam1 localizes to newly formed cell-cell contacts in the developing  
29 nephron. Furthermore, analyses of junctional F-actin upon Daam1 depletion indicate a  
30 decrease in microfilament localization and their slowed turnover. We also show that Daam1 is  
31 necessary for efficient and timely localization of junctional E-cadherin, which is mediated by  
32 Daam1's formin homology domain 2 (FH2). Finally, we establish that Daam1 signaling is

33 essential for promoting organized movement of renal cells. This study demonstrates that Daam1  
34 formin junctional activity is critical for epithelial tissue organization.

35

### 36 **Keywords**

37 E-cadherin; F-actin; adhesion; kidney; nephron; Daam1; formin; Wnt; planar cell polarity;

38 *Xenopus*; collective cell movements; convergence and extension; tubulogenesis

39

### 40 **INTRODUCTION**

41 Extensive cellular rearrangements with changes in cell shape drive morphogenesis, including  
42 for example, the process of tubulogenesis. To execute these processes successfully, cells must  
43 be able to interact with each other and their environment in a timely and coordinated manner.

44 These interactions entail transduction of specific signals arising from adhesive contacts with the  
45 extracellular matrix (ECM) and neighboring cells. How cells remodel their adhesions is one of  
46 the central questions in epithelial tissue biology.

47

48 The cadherin family of cell adhesion proteins such as E-cadherin facilitate intercellular adhesion  
49 and formation of cellular junctions (Adams et al., 1998; Takeichi, 2014; Yap et al., 2015).

50 Changes in E-cadherin-based adhesion are associated with developmental disorders and  
51 progression of disease (Friedl and Mayor, 2017; Mendonsa et al., 2018). E-cadherin levels at  
52 intercellular contacts depend on the organization of the actin cytoskeleton, but much remains to  
53 be learned about how the actin assembly is regulated at these adhesive sites. Moreover, much  
54 of our understanding of *in vivo* actin regulation and dynamics in cell-cell adhesion derives from  
55 observations in cell culture systems, invertebrate embryos and the vertebrate skin.

56 Understanding of junction dynamics in intact vertebrae tissues is challenging, due to technical  
57 limitations and tissue inaccessibility. In this study, we probe the role of the formin protein

58 Dishevelled-associated activator of morphogenesis 1 (Daam1) in intercellular adhesion during

59 kidney development using *Xenopus laevis* embryonic kidney and Madin-Darby canine kidney  
60 (MDCK) cells.

61  
62 Similar to many organs in our body, the kidney consists of a network of epithelial tubules. The  
63 epithelial tubules of the kidney are called nephrons whose morphology is vital to kidney function.  
64 Mesenchymal-epithelial transitions (MET) and coordinated cell rearrangements facilitate  
65 nephron morphogenesis. Nephrons arise from the mass of mesenchymal cells that undergo  
66 MET to form tubules consisting of tightly connected epithelial cells (McMahon, 2016; Saxen,  
67 1987). Oriented cell intercalations drive the elongation of nephric tubules through a process  
68 called convergent-extension (CE) (Castelli et al., 2013; Karner et al., 2009; Kunitomo et al.,  
69 2017; Lienkamp et al., 2012). Extensive cytoskeletal rearrangements characterized by changes  
70 in cell shape and coordinated cell movements accompany CE. Although E-cadherin-based  
71 adhesions are implicated in mediating both MET and maintenance of coordinated cell  
72 rearrangements (Campbell and Casanova, 2016), very little is known about how they function in  
73 nephrogenesis (Combes et al., 2015; Lefevre et al., 2017; Marciano et al., 2011; Vestweber et  
74 al., 1985).

75  
76 Daam1 is a formin protein required for nephric tubulogenesis (Miller et al., 2011). Formin  
77 proteins coordinate the organization of the actin cytoskeleton by nucleating and polymerizing  
78 unbranched actin filaments. While Rho GTPases activate most formins, the activation of Daam1  
79 depends on its interaction with Dishevelled (Dvl), a key intracellular component of the Wnt  
80 signaling pathway (Liu et al., 2008). The Wnt signaling pathway plays important roles in nephron  
81 development (McMahon, 2016; Miller and McCrea, 2009). The secreted Wnt ligands bind  
82 Frizzled (Fz) receptors and subsequently, via Dvl regulate the canonical ( $\beta$ -catenin-dependent)  
83 and non-canonical ( $\beta$ -catenin-independent)/planar cell polarity (PCP) signaling. While the  
84 canonical signaling commonly governs inductive events and cell fate, the non-canonical/PCP

85 branch is associated with influencing cell behaviors and morphology. Nonetheless, the roles for  
86 different branches of the Wnt pathway continue to evolve as recent studies provide evidence for  
87 cross-talk between these two branches (Nagy et al., 2016; O'Brien et al., 2018). Dvl regulates  
88 the non-canonical/PCP branch of the Wnt pathway through direct interaction with Daam1 (Liu et  
89 al., 2008).

90  
91 Increasing evidence suggests that formins may function as key regulators of the actin assembly  
92 at the cell-cell junctions (Grikscheit and Grosse, 2016). Recent work in a mouse mammary  
93 gland epithelial cell line, for example, has indicated that Daam1 is important for the stability of  
94 epithelial cell junctions (Nishimura et al., 2016). Here, we expand on these findings by  
95 examining the functional role of Daam1 in cellular junctions in the context of tissue  
96 morphogenesis by analyzing its role in nephron development. Furthermore, using live cell  
97 imaging we show that during establishment of cellular junctions, Daam1 first localizes to cellular  
98 protrusions that initiate cell-cell contact, and subsequently, to newly formed junctions to promote  
99 their stability. We find that Daam1 facilitates nephron morphogenesis by regulating the  
100 assembly of junctional filamentous actin (F-actin) and in turn promotes the E-cadherin-based  
101 epithelial adhesion.

102

## 103 **RESULTS**

### 104 **Daam1 co-localizes with F-actin and E-cadherin within the nephric primordium**

105 Knockdown of Daam1 in *Xenopus* disrupts nephron morphology without apparent effect on the  
106 expression of genes related to early differentiation events (Miller et al., 2011). Differentiation  
107 signals driving development of the nephric mesoderm in *Xenopus* largely function before the  
108 onset of tubular morphogenesis (Vize et al., 2003). To further probe the mechanism by which  
109 Daam1 regulates the shaping of nephrons, we analyzed the subcellular localization of  
110 fluorescently tagged Daam1 at the beginning of tubular morphogenesis (around NF stage 30).

111 Through kidney-targeted microinjections that were targeted to early embryonic cells fated to  
112 contributed to kidney (presumptive nephron progenitors) (DeLay et al., 2016; Moody and Kline,  
113 1990), we expressed 1ng of fluorescently tagged Daam1 mRNA in the presumptive nephron  
114 progenitors and analyzed its localization in fixed and live tissue.

115

116 For analyses of fixed tissue, embryos were subjected to whole-mount staining. The samples  
117 were stained with an antibody against GFP to visualize Daam1, and an antibody against Lhx1 to  
118 label nephron progenitors (DeLay et al., 2018; Venegas-FERRÍN et al., 2010). An additional  
119 staining with Phalloidin allowed us to visualize the F-actin cytoskeleton, or alternatively, another  
120 antibody was used to define the localization of E-cadherin (**Figure 1**). Consistent with its  
121 previously reported subcellular localization in other cell types (Corkins et al., 2019; Higashi et  
122 al., 2019; Jaiswal et al., 2013; Kawabata Galbraith et al., 2018; Kida et al., 2007; Nishimura et  
123 al., 2012, 2016), Daam1 co-localizes with patches of F-actin, showing a more diffuse staining  
124 pattern in the cytoplasm and a strong localization to cell junctions (**Figure 1A**). Furthermore,  
125 co-immunostaining for GFP and E-cadherin demonstrated that E-cadherin is expressed within  
126 the nephric primordium and it co-localizes with Daam1 at the cell-cell junctions (**Figure 1B**).

127

128 During the early stages of development, the opaqueness of the *Xenopus* epithelium hinders  
129 imaging of fluorescent protein expression in internal tissues, including the pronephric  
130 primordium. In fixed tissues, this is overcome by using clearing agents such as BA:BB (1:2  
131 mixture of benzyl alcohol and benzyl benzoate, aka Murray's clear). However, this process  
132 requires dehydration of samples in methanol or ethanol prior to clearing, which is incompatible  
133 with the use of fluorescent phalloidins (Becker and Gard, 2006). To overcome this obstacle, we  
134 briefly washed embryos (< 20 sec) in isopropanol prior to clearing with BA:BA (Nworu et al.,  
135 2014; Strickland et al., 2004). This allowed us to visualize Daam1 in conjunction with F-actin in  
136 intact pronephric primordium (**Figure 1A**).

137

138 To overcome an analogous challenge in live embryos, we developed a novel way of imaging the  
139 nephric primordium *in vivo* (**Figure 2A**). Previous studies have used the “windowed” embryo  
140 approach consisting of microsurgical removal of the surface ectoderm to expose and image  
141 underlying tissue (Kim and Davidson, 2013). Adopting this approach, we created “kidney-  
142 windowed” embryos by removing the surface epithelium and exposing the underlying nephric  
143 primordium for high-resolution *in vivo* imaging. *In vivo* time-lapse imaging of “kidney-windowed”  
144 embryos showed GFP-Daam1 localizing to the cell-cell junctions. However, we observed that  
145 GFP-Daam1 also localized to cytoplasmic vesicles and cellular protrusions (**Figure 2B, Video**  
146 **S1**). These observations are in line with previous reports on Daam1’s localization and likely  
147 hindered in imaging of fixed tissue due to unfavorable fixation conditions for observations of  
148 cytoplasmic vesicles and cellular protrusions (Corkins et al., 2019; Jaiswal et al., 2013;  
149 Kawabata Galbraith et al., 2018; Kida et al., 2007; Nishimura et al., 2012, 2016). Moreover, to  
150 better understand the dynamics of Daam1 in the context of cell junctions, we imaged *de novo*  
151 formation of cell-cell junctions in dissociated GFP-Daam1 expressing cells derived from the  
152 nephric primordia (**Figure 2A**). *In vivo* time-lapse analyses of these cells showed that Daam1  
153 localizes to filopodia-like protrusions and subsequently, to newly formed junctions (**Figure 2B,**  
154 **Video S2**).

155

156 Finally, we assessed the localization of Daam1 in the mature epithelium of fully developed  
157 nephrons (**Figure S1**). Interestingly and importantly, junctional localization of Daam1 was not  
158 detected in the mature epithelium. Taken together, these data suggested the potential role for  
159 Daam1 in regulating the intercellular adhesion of renal progenitors specifically at the onset of  
160 tubulogenesis and CE.

161

162 **Daam1 controls the organization and assembly of junctional F-actin within the nephric**  
163 **primordium**

164 The observation that Daam1 co-localizes with junctional F-actin in developing *Xenopus*  
165 nephron, led us to ask whether Daam1 regulates F-actin. To address this, we depleted Daam1  
166 in nephron progenitors by utilizing Morpholino (MO) oligos in kidney-targeted microinjections  
167 (DeLay et al., 2016; Moody and Kline, 1990). A proven Daam1 MO or an established Control  
168 (standard) MO (Habas et al., 2001; Liu et al., 2008; Miller et al., 2011) was co-injected with a  
169 membrane tagged GFP (mGFP) mRNA, that served as a lineage tracer. MO-injected embryos  
170 were fixed at the onset of tubular morphogenesis (around NF stage 30) and subjected to whole-  
171 mount fluorescent staining and high-resolution confocal imaging. To verify the success of our  
172 injections and knockdowns, we also carried out Western blot analyses of total protein lysates  
173 prepared from stage 30 MO-injected embryos (**Figure 3B**). Phalloidin staining revealed that  
174 upon Daam1 depletion, the F-actin in renal progenitors becomes disorganized and significantly  
175 reduced at cell-cell junctions (**Figure 3A and 3C, Videos S3 and S4**). These results suggest  
176 that Daam1 contributes to the organization of the F-actin cytoskeleton and actin filaments at  
177 cell-cell junctions during nephron development.

178  
179 We also observed alterations in spatial positioning and the overall organization of nephron  
180 progenitors upon depletion of Daam1. Nephric primordia in Daam1-morphants consist of fewer  
181 progenitor cells (**Figure 3D**) that are spaced farther part from one another (**Figure 3E**)  
182 compared to control animals. In addition to changes in the number and position of nephron  
183 progenitors, we also noted changes in cell morphology. Nephric progenitors with diminished  
184 Daam1 activity display an increase in cell area (**Figure 3F**) and circularity (**Figure 3G**).

185  
186 Since polymerization of F-actin filaments is a highly dynamic process, and to better understand  
187 possible mechanisms underlying the observed morphological perturbations, we next assessed

188 the dynamic behavior of F-actin *in vivo* using fluorescence recovery after photobleaching  
189 (FRAP) assays. We labeled F-actin in developing nephrons by co-injecting mCherry tagged  
190 Utrophin (mCherry-UtrCH) mRNA (Burkel et al., 2007) along with control or Daam1 morpholino.  
191 To probe F-actin dynamics in the context of the intact animal, we utilized the “kidney-windowed”  
192 approach in NF stage 30 embryos. Overall, FRAP experiments suggest slower turnover of  
193 junctional F-actin in Daam1-depleted nephrons in comparison with controls (**Figure 4**). In  
194 control nephrons, 100% of bleached cell junctions successfully recover fluorescence signal.  
195 Whereas, in Daam1-depleted nephrons, only 59% of bleached junctions recovered (**Figure 4A**).  
196 Cell-cell junctions are comprised of dynamically mosaic E-cadherin clusters coupled to different  
197 actin dynamics (Cavey et al., 2008; Indra et al., 2018). Therefore, the differences observed in  
198 the dynamics of F-actin in Daam1 knockdown contexts potentially indicate the existence of two  
199 actin pools differentially regulated by Daam1. However, it also possible that the observed  
200 differences stem from the cell heterogeneity (e.g. in respect to Daam1 expression levels or cell-  
201 type representation) within the nephric primordium. As we were unable to quantitatively assess  
202 F-actin dynamics in junctions that fail to recover, we only used junctions with detectable  
203 recovery signal to determine the mean half-time to recovery (**Figure 4D**) and the mean mobile  
204 fraction (**Figure 4E**) values. For each junction values were taken from individually fitted curves.  
205 These data indicate that the mean recovery half-time for junctional F-actin in Daam1 KD  
206 nephrons is significantly slower ( $5.57 \text{ sec} \pm 0.99 \text{ s.e.m.}$ ) in comparison with control nephrons  
207 ( $3.70 \text{ sec} \pm 0.35 \text{ s.e.m.}$ ) (**Figure 4D**). In contrast, the mean mobile fractions are relatively similar  
208 ( $56.0\% \pm 4.2 \text{ s.e.m}$  for control and  $54.3\% \pm 4.5 \text{ s.e.m}$  for Daam1 KD) (**Figure 4E**). From these  
209 data, we conclude that Daam1 is driving the rate of F-actin turnover to promote polymerization  
210 of junctional actin during nephron development. Moreover, these data also suggest that the  
211 decrease in F-actin fluorescence levels observed upon Daam1 depletion is likely a  
212 consequence of impaired actin assembly.

213



214 **Daam1 promotes localization of E-cadherin at cell-cell contacts**

215 The interplay between E-cadherin and the actin cytoskeleton promotes intercellular adhesion  
216 and assembly of cellular junctions. Therefore, we asked whether the changes observed in  
217 junctional F-actin dynamics upon the knockdown of Daam1 alters the intercellular adhesion  
218 between nephron progenitors. To examine if Daam1 regulates intercellular adhesion, we  
219 analyzed the effect of Daam1 depletion on E-cadherin localization in developing nephron  
220 **(Figure 5)**. Daam1 morphants displayed reduced levels of E-cadherin at the interfaces between  
221 neighboring cells during these early stages of pronephric morphogenesis **(Figure 5A)**. This  
222 difference was quantified and likewise made evident by measuring the fluorescence intensity  
223 profiles of E-cadherin along the length of individual junctions **(Figure 5B)**. Of note and in  
224 contrast, there was no difference in the overall E-cadherin protein levels between Daam1  
225 knockdown and control embryos as determined by Western blotting **(Figure 5C)**. These findings  
226 suggest that Daam1 is likely more important for localization of E-cadherin at cell-cell contacts as  
227 opposed to regulating the overall expression levels of E-cadherin.

228

229 Interestingly, Daam1 depleted cells remain capable of forming nephrons. Studies carried out in  
230 MDCK cells using the pan-formin inhibitor SMIFH2 suggest that formins are required for early,  
231 but not later stages of cell-cell adhesion (Collins et al., 2017). Moreover, Daam1 depleted  
232 mammary epithelial cells form a monolayer characterized by irregular tilting of lateral cell  
233 membranes and distorted cell morphology (Nishimura et al., 2016). To further understand the  
234 function of Daam1 in nephron assembly, we analyzed the epithelium of mature nephrons in NF  
235 stages 39-40 embryos **(Figure S2)**. Indeed, we did not observe any apparent changes in the  
236 local concentration of junctional E-cadherin in mature nephrons of Daam1 knockdown and  
237 control embryos **(Figure S2A)**. However, Daam1 knockdown nephrons displayed defects in the  
238 size of the tubular lumen. The diameter of tubular lumens was more variable in Daam1 deficient  
239 nephrons compared to the controls. Similar to observations in mammary epithelial cells

240 (Nishimura et al., 2016), tubular cells in Daam1 depleted nephrons are less uniform in shape  
241 and characterized by an irregular tilting of lateral cell membranes (**Figure S2A; Videos S5 and**  
242 **S6**). We further found that when visualized by transmission electron microscopy (TEM), Daam1  
243 depleted cells appear less columnar, characterized by indistinct and wavy cell borders (**Figure**  
244 **S2B**). Our results suggest that Daam1 regulates the adhesion between nephron progenitor cells  
245 and subsequently, the morphology of the mature nephric epithelium.

246

### 247 **E-cadherin localization is mediated by the Daam1 FH2 domain**

248 Daam1 is known to act upstream of small Rho-GTPases, which regulate the actin cytoskeleton  
249 (Habas et al., 2001; Liu et al., 2008); therefore, we next tested the importance of the actin  
250 polymerization activity of Daam1 in intercellular adhesion. Formins are defined by a conserved  
251 Formin Homology 2 (FH2) domain. The Daam1 forms a dimer via its FH2 domain, responsible  
252 for nucleation and elongation of actin filaments (Lu et al., 2007; Yamashita et al., 2007). The  
253 mutation isoleucine-to-alanine (Ile698Ala) in the Daam1 FH2 domain abolishes the actin  
254 polymerization activity of Daam1 *in vitro* (Lu et al., 2007) and *in vivo* (Liu et al., 2008; Nishimura  
255 et al., 2016). In kidney targeted-injections, we expressed either full-length GFP-Daam1 or GFP-  
256 Daam1 FH2 mutant (Ile698Ala) mRNA and analyzed the effect on E-cadherin localization in the  
257 nephric progenitors (**Figure 6**). Nephric progenitors expressing GFP-Daam1 FH2 mutant mRNA  
258 showed reduced levels of E-cadherin at the interfaces between neighboring cells in comparison  
259 to nephric progenitors expressing GFP-Daam1 (**Figure 6A-B**). However, the E-cadherin  
260 phenotype appeared to be less prominent than in Daam1 knockdown. Functional studies  
261 showed that while an isoleucine-to-alanine mutation within FH2 domain abolishes Daam1's  
262 ability to polymerize actin, it does not prevent its activation of Rho (Liu et al., 2008). This could  
263 be one possible explanation as to why E-cadherin localization is more affected in Daam1  
264 knockdown nephric progenitors. Furthermore, we assessed Daam1 protein levels in injected  
265 embryos to determine if the observed differences in E-cadherin localization were potentially due

266 to underlying disparities in translation efficiency or protein stability of GFP-Daam1 and GFP-  
267 Daam1 FH2 mutant (**Figure 6C**). We found that Daam1 protein was present at equivalent levels  
268 in the two samples, making these possibilities unlikely. Ultimately, the GFP-Daam1 FH2 mutant  
269 expressing progenitors mature into nephrons characteristic of Daam1 knockdown (**Figure S3**).  
270 These results establish that the Daam1 FH2 domain is necessary for the localization of E-  
271 cadherin to cell-cell contacts in nephron progenitors.

272

### 273 **Daam1 mediates cohesion of MDCK cells**

274 Nephron morphogenesis is achieved through the process called convergent extension (CE)  
275 (Lienkamp et al., 2012). The CE is a type of collective cell movement characterized by a series  
276 of coordinated and directed cell rearrangements (Huebner and Wallingford, 2018; Tada and  
277 Heisenberg, 2012). In recent years E-cadherin has emerged as a key mediator for coordinating  
278 cohesion and directional persistence of collective cell movements in both epithelial and  
279 mesenchymal clusters (Cai et al., 2014; Campbell and Casanova, 2015; Cohen et al., 2016).  
280 Our results demonstrate that Daam1 is necessary for the organization of nephrogenic  
281 primordium (**Figure 3**) and a proper localization of E-cadherin (**Figures 5 and 6**); therefore, we  
282 wanted to determine if Daam1 is necessary for the coordination of direction between renal cells.  
283 Because the opaqueness of *Xenopus* nephron progenitors prevents *in vivo* tracking of their  
284 movements in 3D, we utilized Madin-Darby Canine Kidney (MDCK) cells. We generated MDCK  
285 cells constitutively expressing an shRNA against Daam1 and analyzed whether the E-cadherin  
286 localization is affected in these cells (**Figures 7A and S4**). The efficiency of shDaam1  
287 knockdown was confirmed by Western blot (**Figure 7B**). Similar to what we saw in *Xenopus*  
288 nephrons, we observed impaired localization of E-cadherin in nascent (**Figure 7A**), but not  
289 mature adhesions (**Figure S4**) upon knockdown of Daam1. We next examined the migratory  
290 behavior of Daam1 knockdown cells in a time-lapse imaging of the wound-healing assay  
291 (**Figure 7C-F; Video S7**). We found Daam1 knockdown cells exhibit a delay in a wound closure

292 compared to control cells (**Figure 7C; Video S7**). Additionally, we also observed random  
293 detachment of Daam1-deficient cells from the migrating epithelial sheets (**Video S7**). To better  
294 understand the behavior of these cells, we tracked their movement within the migrating sheets  
295 over time. (**Figure S7**). From these tracks, we obtained the relative distances over which cells  
296 traveled and used those distances to assess cell velocities (**Figure 7C**). These analyses show  
297 that the speed at which Daam1 knockdown cells move is higher than that of the control cells,  
298 demonstrating that delayed wound closure in Daam1 knockdown cells is not caused by their  
299 slow movement. However, mapping the trajectory paths for Control (**Figure 7E**) and shDaam1  
300 (**Figure 7D**) cells revealed that the movement of Daam1-deficient cells is less directed  
301 compared to control. These data demonstrate that Daam1 is necessary for communication of  
302 direction between the cells. Taken together, these results indicate that Daam1 contributes to  
303 cohesion by regulating connectiveness of cells through E-cadherin.

304

## 305 **DISCUSSION**

306 Using *Xenopus* embryonic kidney and MDCK cells as model systems, we show that Daam1  
307 mediates E-cadherin dependent intercellular adhesion and organization of nephrogenic  
308 primordia by regulating polymerization of junctional actin filaments. Ultimately, this affects the  
309 morphology of mature nephric epithelium. These findings have a number of important  
310 implications for the regulation of intercellular adhesion and epithelial tubulogenesis.

311

312 First, we show that both Daam1 and E-cadherin localize to cell-cell contacts during nephron  
313 development and that Daam1 is required for promoting E-cadherin localization at sites of cell-  
314 cell contact. In contrast to what we observed during these early stages of nephron development  
315 following the depletion of Daam1, in mature nephrons, we were unable to detect junctional  
316 Daam1, and we likewise did not observe the effect on localization of E-cadherin. These data

317 suggest that Daam1 is necessary for efficient localization of E-cadherin at cell junctions in  
318 nephron progenitor cells during early stages of nephron morphogenesis.

319

320 This conclusion builds upon certain assumptions. For example, it is possible that the  
321 overexpression of GFP-Daam1 has an impact on our localization analyses, or that cells  
322 depleted of Daam1 in mature nephrons are starting to recover due to a decrease in available  
323 morpholino pools with time. However, multiple lines of evidence suggest that both of these  
324 scenarios are highly unlikely. In the first case, prior studies indicate that the overexpression of  
325 full length Daam1 has little to no affect the actin cytoskeleton or other cellular processes (Liu et  
326 al., 2008). Additionally, several studies demonstrate that the distribution of the GFP-Daam1  
327 recapitulates its endogenous localization as discerned via immunostaining (Jaiswal et al., 2013;  
328 Li et al., 2011; Nishimura et al., 2012, 2016). In the second case, consistent with our  
329 observations in *Xenopus* nephrons, sub-confluent cultures of MDCK cells stably expressing  
330 shDaam1 show transient repression of E-cadherin localization to cell-cell contacts that appears  
331 to be lost as the cells become confluent.

332

333 Indeed, our data support recent findings suggesting that actin nucleating proteins and Rho  
334 GTPases are required for early stages of E-cadherin mediated cell-cell adhesion in MDCK  
335 epithelial cells and not the maintenance of mature junctions (Collins et al., 2017). They also  
336 imply that morphological defects that we see in mature nephrons are consequences of earlier  
337 events. It is interesting to note that in similar fashion the silencing of E-cadherin expression in  
338 MDCK cells disrupts formation of cell-cell junctions whereas its signaling seems to be largely  
339 dispensable in already established epithelium as long as the cells are not mechanically stressed  
340 (Capaldo and Macara, 2007).

341

342 Second, we show that Daam1 localizes to actin protrusions and newly formed cell-cell contacts  
343 in developing nephron, suggesting that Daam1 via E-cadherin coordinates the assembly of cell-  
344 cell junctions during CE. Actin polymerization at the cell's membrane mediates polarized  
345 movement and intercalation of cells during CE through engagement of cadherins (Huebner and  
346 Wallingford, 2018; Huebner et al., 2020). Here, we show that Daam1 activity functions to ensure  
347 proper organization and size of nephrogenic primordium at the time of CE as well as polarized  
348 movement of renal epithelial sheets. Our data support previous studies implicating Daam1 in CE  
349 and polarized cell movements (Ang et al., 2010; Kida et al., 2007; Liu et al., 2008). Furthermore,  
350 we show that Daam1 mediates polarized movement and cohesion of MDCK cells without  
351 slowing down the motility of individual cells. Taken together these data suggest that Daam1  
352 promotes collective cell movements by controlling actin's polymerization at cell-cell contacts and  
353 strengthening of E-cadherin-based adhesion.

354  
355 Finally, Wnt9b and Wnt11 regulate tubular nephron morphogenesis, and disruptions in the cell  
356 behaviors traditionally regulated by the PCP pathway define their loss-of-function phenotypes  
357 (Karner et al., 2009; O'Brien et al., 2018). We show that inhibiting signaling activity of Daam1 in  
358 the prospective nephron results in a set of phenotypic characteristic comparable to those  
359 reported for Wnt11 and Wnt9b. Moreover, earlier studies have demonstrated that Daam1 can  
360 rescue Wnt11- induced CE gastrulation defects (Liu et al., 2008). These data collectively point  
361 to Daam1 as a potential downstream effector of Wnt11 and Wnt9b signaling in the control of  
362 nephric tubulogenesis. Interestingly, *wnt9b* and *wnt9a* are also induced in the injured nephrons  
363 and a mutation in *fzd9b* is associated with reduced regenerative capacity of nephric tubules  
364 (Kamei et al., 2019). These findings also suggest a potential role for Daam1 in repair and  
365 regeneration of nephric tubules. This hypothesis is further supported by increasing research  
366 evidence that the actin-based protrusions are important for the repair of cell-cell junctions (Li et

367 al., 2020) and studies showing that Daam1 promotes assembly of actin-based protrusions  
368 (Jaiswal et al., 2013; Nishimura et al., 2016).  
369  
370 Cadherin localization is a complex process, and current studies propose at least three different  
371 ways of achieving efficient localization of E-cadherin: (1) clustering enforced by cortical F-actin,  
372 (2) clustering regulated by exposure of neighboring cells through their actin-based protrusions  
373 and (3) clustering promoted by condensation of F-actin networks via myosin (Yap et al., 2015).  
374 However, further research into timely regulation of E-cadherin is required to characterize the  
375 precise molecular details and specify relationships between different modes of E-cadherin  
376 clustering. Ultimately, investigations into how regulation of junctional E-cadherin by Daam1 fits  
377 in with different modes of E-clustering will also be important to examine in the future.

378

## 379 **ACKNOWLEDGMENTS**

380 We thank Miller lab members as well as Dr. Pierre McCrea and Dr. Jae-II Park and their lab  
381 members for lively discussions and suggestions on the manuscript. We also thank Dr. Richard  
382 Behringer, Dr. Yoshihiro Komatsu, Dr. Oleh Pochynyuk and Dr. Anna Marie Sokac, for their  
383 input and suggestions on the project. We thank Kenneth Dunner Jr. at the UT MD Anderson  
384 High Resolution Electron Microscopy Facility and CCSG grant NIH P30CA016672 for support  
385 with the transmission electron microscopy data. We are also thankful to Raymond Habas, Bruce  
386 Goode, Norihiro Sudou and Masanori Taira for providing antibodies and constructs. We thank  
387 the instructors and teaching assistants of the 2015 National *Xenopus* Resource Advanced  
388 Imaging Course. We are grateful to J.C. Whitney and T.H. Gomez who took care of the animals,  
389 even during Hurricane Harvey. We are grateful to the UTHealth Office of the Executive Vice  
390 President and Chief Academic Officer and the Department of Pediatrics Microscopy Core for  
391 funding the Zeiss LSM800 confocal microscope. We also thank BSRB Microscopy Facility at  
392 Department of Genetics, UT-MD Anderson Cancer Center. This work was funded by National

393 Institute of Diabetes and Digestive and Kidney Diseases grants (K01DK092320, R03DK118771  
394 and R01DK115655 to R.K.M.), startup funding from the Department of Pediatrics, Pediatric  
395 Research Center at the McGovern Medical School (to R.K.M.), The Antje Wuelfrath Gee and  
396 Harry Gee, Jr. Family Legacy Scholarship (to V.K.S.), and The Gigli Family Endowed  
397 Scholarships (to V.K.S.)

398

### 399 **AUTHOR CONTRIBUTIONS**

400 V.K.S. conceived of the project, performed experiments, analyzed data and wrote the original  
401 draft of the manuscript. M.E.C. cloned pCS2-mCherry-Daam1 and pCS2-mCherry-Daam1  
402 (Ile698Ala) constructs and contributed to data validation. V.K.S., M.E.C., A.B.G. and R.K.M.  
403 performed experiments to generate MDCK shDaam1 cells. V.K.S. and A.P. imaged the wound  
404 healing assays, FRAP experiments and analyzed FRAP data. V.K.S. and M.K. conducted TEM  
405 imaging analyses. A.B.G. and R.K.M. oversaw the experiments and supervised the project. All  
406 authors were involved in critical evaluation and editing of the manuscript.

407

### 408 **DECLARATION OF INTERESTS**

409 The authors declare no competing interests.

410

411

### 412 **FIGURE TITLES AND LEGENDS**

413

#### 414 **Figure 1. Daam1 co-localizes with junctional F-actin and E-cadherin during early nephron** 415 **development**

416

417 Confocal maximum image projections of whole-mount immunostaining of *Xenopus* nephric  
418 primordium labeled by Lhx1 (magenta) and GFP to visualize Daam1 (green) in conjunction with,  
419 (A) Phalloidin staining to visualize F-actin (red) or  
420 (B) E-cadherin (cyan);  
421  
422  
423  
424 a'-a''' and b'-b''' represent close-up images of white boxes.

425

426



427 **Figure 2. Daam1 localizes to newly formed cell-cell contacts**

428 (A) Schematic illustration showing steps involved in preparation of “windowed kidney” embryos  
429 and primary cultures expressing GFP-Daam1. Please note that for clarity of illustration the 8-cell  
430 GFP-Daam1 injected *Xenopus* blastomere is fate-mapped strictly to the nephric primordium and  
431 that blastomere also contributes to epidermis, ventral and dorsal somites, hidgut, proctodeum  
432 and trunk neural crest cells (DeLay et al., 2016; Moody and Kline, 1990).

433 (B) Time-lapse imaging montage of the nephric primordium expressing GFP-Daam1 in  
434 “windowed kidney” embryos. Elapsed time is indicated at the top in seconds; see **Video S1**.

435 (C) Time-lapse imaging montage shows cells isolated from a developing nephron expressing  
436 GFP-Daam1 mRNA adhering with each other. Elapsed time is indicated at the top in seconds.  
437 The border arising between two cells is delineated by the red dotted line; see **Video S2**.

438  
439 **Figure 3. Effects of Daam1 depletion on the nephrogenic primordium**

440  
441 (A) Maximum projection confocal images of F-actin expression (red) in nephric primordium  
442 (magenta) in Control and Daam1 knockdown embryos. a-a’ and b’-b’ represent close-up  
443 images of the corresponding regions in white boxes; see **Videos S3 and S4**.

444 (B) Western blot showing Daam1 and GAPDH (control) protein levels for uninjected wild type  
445 (WT) and Control (Standard morpholino) and Daam1 KD (Daam1 morpholino) injected embryos.

446 (C) The graph showing the relative fluorescence intensity levels of junctional F-actin in the  
447 nephric primordia of Control and Daam1 KD embryos.  $N_{\text{Control}}=40$  junctions on 2 embryos and  
448  $N_{\text{Daam1 KD}}=40$  junctions on 2 embryos. \*\*\*\* $P < 0.0001$  analyzed by unpaired t-test.

449 (D-G) Morphometric analyses of Control and Daam1-depleted nephric primordia. The thick bars  
450 represent the mean, \*\*\*\* $P < 0.0001$  analyzed by unpaired t-test, (E-G)  $N_{\text{Control}}=40$  junctions on 2  
451 embryos and  $N_{\text{Daam1 KD}}=40$  junctions on 2 embryos. Graphs showing comparison between  
452 Control and Daam1-depleted nephric primordia of,

453 (D) the average number of Lhx1-positive nephron progenitors where  $N_{\text{Control}}=5$  embryos and  
454  $N_{\text{Daam1KD}}=5$  embryos,

455 (E) the relative distance between nearest neighbors of Lhx1-positive nuclei,

456 (F) the relative cell area and

457 (G) the relative circularity, where 1 represents the perfect circle.

458

459 **Figure 4. Daam1 regulates assembly of junctional F-actin in developing nephron**

460

461 F-actin dynamics at cell-cell junctions of Control and Daam1-depleted developing nephrons  
462 expressing mCherry-Utrophin were assessed using FRAP.

463 (A) Percentage of junctions showing recovery of fluorescence after bleaching in Control (black,

464  $N_{\text{total}}=27$  junctions, 1-5 junctions/embryo) and Daam1 KD (purple and orange,  $N_{\text{total}}=27$  junctions,

465 1-5 junctions/embryo) nephrons.

466 (B) Typical time-lapse images of Control and Daam1-depleted cell junctions before and after

467 photobleaching. In each image, the bleached region is highlighted with a circle (black - Control

468 junction showing recovery, purple - Daam1 KD junction showing recovery and orange - Daam1

469 KD junction showing no-recovery of fluorescence after photobleaching).

470 (C) Graph shows average recovery curves obtained from individual best-fit plots for Control

471 (black), Daam1 KD junctions with (purple) and without (orange) recovery of fluorescence after

472 photobleaching.

473 (D-E) Bar graphs comparing Control and Daam1 KD profiles calculated from individual best-fit

474 curves for Control (black) and Daam1 KD junctions with recovery of fluorescence after

475 photobleaching (purple). Data represent the mean  $\pm$  S.E. from three independent experiments.

476 P-values were analyzed by unpaired t-test.

477 (D) Bar graph of the relative half-times for F-actin.

478 (E) Bar graph of the relative mobile fraction for F-actin.

479

480 **Figure 5. Daam1 promotes localization of junctional E-cadherin**

481

482 (A) Maximum projection confocal images of E-cadherin expression (cyan) in nephric primordium

483 (magenta) in Control and Daam1 KD embryos a-a' and b-b' represent the close-up images of

484 corresponding regions in white boxes.

485 (B) Violin plots depicting the relative fluorescence intensity of junctional E-cadherin in the  
486 nephric primordia of Control (orange) and Daam1 KD (blue).  $N_{\text{Control}}=88$  junctions on 4 embryos  
487 and  $N_{\text{Daam1 KD}}=84$  junctions on 4 embryos. Center-lines represents median; Limits show 1<sup>st</sup> and  
488 3<sup>rd</sup> quartile. \*\*\*\* $P<0.0001$  analyzed by unpaired t-test.

489 (C) Western blot showing Daam1, E-cadherin and GAPDH (control) protein levels in uninjected  
490 wild type (WT) and Control (Standard morpholino) and Daam1 KD (Daam1 morpholino) injected  
491 embryos.

492  
493 **Figure 6. E-cadherin localization to cell-cell junctions is mediated by FH2 domain of**  
494 **Daam1**

495  
496 (A) Maximum projection confocal images showing E-cadherin staining (cyan) in nephric  
497 primordium (magenta) expressing GFP-Daam1 or GFP-Daam1 FH2 mutant mRNA. a-a' and b-  
498 b' represent close-up images of corresponding regions in white boxes.

499 (B) Violin plots depicting the relative fluorescence intensity of junctional E-cadherin in the  
500 nephric primordia expressing GFP-Daam1 (orange) and GFP-Daam1 FH2 mutant (blue) mRNA.  
501  $N_{\text{Daam1}}=60$  junctions on 3 embryos and  $N_{\text{Daam1 FH2 mutant}}=55$  junctions on 3 embryos. Center-lines  
502 represents median; Limits show 1<sup>st</sup> and 3<sup>rd</sup> quartile. \*\*\* $P<0.0002$  analyzed by unpaired t-test.

503 (C) Western blot showing the exogenous and endogenous protein levels of Daam1 in uninjected  
504 wild type (WT) embryos, embryos injected with 1 ng of GFP-Daam1 mRNA and 1ng GFP-  
505 Daam1 FH2 mutant mRNA. The non-specific band confirms equal loading.

506  
507  
508 **Figure 7. Daam1- depleted MDCK cells display compromised localization of E-cadherin at**  
509 **cell-cell contacts and impaired cohesion during collective movement**

510  
511 (A) E-cadherin (green), F-actin (red) and DAPI (blue) in subconfluent the MDCK Control and  
512 shDaam1 knockdown cells. E-cadherin localization in the nascent cell-cell contacts (marked by  
513 white brackets and shown enlarged in corresponding white boxes) is impaired in shDaam1-  
514 deficient cells.

515 (B) Western blot analysis of Daam1 and GAPDH protein levels in the MDCK Control and  
516 shDaam1 knockdown cells.

517 (C-F) Summary of the wound-healing experiments for the MDCK Control and Daam1 KD cells,  
518 **see Video S7.**

519 (C) Daam1 depletion impairs wound closure. The graph represents the percent of the wound  
520 surface area over time for Control (purple) and Daam1 KD (orange) cells. Error bars indicate  
521 S.E. of the mean on 4 assays.

522 (D-F) Manually tracking migration paths of single-cells during the wound closure demonstrates  
523 that Daam1 organizes collective movement of the MDCK epithelial monolayers by modulating  
524 the speed and directionality of individual cells. Depletion of Daam1 results in increased velocity  
525 and random migration.  $N_{\text{Control}}=52$  cells from 4 assays and  $N_{\text{Daam1 KD}}=42$  cells tracked from 4  
526 assays. Cells were tracked in 15 minutes increments for 12 hours.

527 (D) Violin plots represent migration velocity calculated from tracking traveled distances of single  
528 cells for Control and Daam1 KD cells. Center-lines represents median; Limits show 1<sup>st</sup> and 3<sup>rd</sup>  
529 quartile. \*\*\* $P<0.0001$  analyzed by unpaired t-test.

530 (E) Wind-rose plot showing migration tracks of individual Control cells.

531 (F) Wind-rose plot showing migration tracks of Daam1 KD cells.

532  
533  
534

## MATERIALS AND METHODS

### 535 *Xenopus laevis*

536 *Xenopus laevis* adult male and female frogs were obtained from Nasco (LM00531MX and  
537 LM00713M) (Fort Atkins, WI, USA) and maintained according to standard procedures. *Xenopus*  
538 embryos were obtained by *in vitro* fertilization (Sive et al., 2000) and staged as previously  
539 described by Nieuwkoop and Faber (NF) (Nieuwkoop and Faber, 1994). All work was carried  
540 out in accordance with the University of Texas Health Science Center at Houston, Institutional  
541 Animal Care and Use Committee (IACUC) protocol #AWC-19-0081.

542

### 543 MDCK cell lines

544 Madin-Darby Canine Kidney (MDCK) II cell lines were purchased from the American Type  
545 Culture Collection (ATCC). MDCK cells were cultured at 37°C with 5% CO<sub>2</sub> in Dulbecco's

546 Modified Eagle's Medium (DMEM) (Sigma, D6429) supplemented with 10% fetal bovine serum  
547 (FBS) (Sigma, F0926) and 1% Antibiotic-antimycotic solution (Sigma, A5955).

548

### 549 **Embryo microinjections**

550 *Xenopus* embryos were microinjected at one-cell or into V2 blastomere at eight-cell stage,  
551 targeting embryonic kidney (DeLay et al., 2016; Moody and Kline, 1990; Nieuwkoop and Faber,  
552 1994). Embryos were injected with synthetic mRNAs alone or in combination with antisense  
553 morpholino oligonucleotides (MOs). For mRNA injections, capped mRNA transcripts were  
554 synthesized from DNA-plasmids using SP6 mMessage mMachine transcription kit  
555 (ThermoFisher, AM1340M) and purified. pCS2-GFP-Daam1 and pCS2-GFP-Daam1 (Ile698Ala)  
556 plasmids were a gift from Dr. Raymond Habas's and Dr. Bruce Goode's labs, respectively (Lu et  
557 al., 2007). A mutation A2822G discovered in these plasmids was corrected by site directed  
558 mutagenesis as previously reported (Corkins et al., 2019) prior to mRNA synthesis. pCS2-  
559 membrane-tagged-RFP (mRFP)(Davidson et al., 2006), pCS2-membrane-tagged-EGFP  
560 (mEGFP)(Shindo and Wallingford, 2014) and pCS2-mCherry-Utrophin (mCherry-UtrCH)(Burkel  
561 et al., 2007) constructs were gifts from Dr. Raymond Keller's lab, Dr. John Wallingford's lab and  
562 Dr. William Bement's lab, respectively. Formerly developed translation-blocking Daam1  
563 (5'GCCGCAGGTCTGTCAGTTGCTTCTA 3') (Corkins et al., 2018; Habas et al., 2001; Miller et  
564 al., 2011) and standard control (5'CCTCTTACCTCAGTTACAATTTATA 3') MOs were  
565 purchased from GeneTools, LLC (Philomath, OR, USA). MOs were injected at 20ng per embryo  
566 while the amount of injected mRNA per embryo were as follows: GFP-Daam1 [1ng], mCherry-  
567 Daam1 [1ng], GFP-Daam1(I698A) [1ng], mCherry-Daam1(I698A) [1ng], mRFP [0.5ng], mGFP  
568 [0.5ng] and mCherry-UtrCH [1ng].

569

### 570 **Generation of stable MDCK shDaam1 cell lines**

571 shDaam1 knockdown cell lines were generated by a retrovirus-based transduction method as  
572 described (Corkins et al., 2019). Briefly, the pLKO.1 lentiviral shDaam1 constructs  
573 (TTTCAGGAGATAGTATTGTGC, AACAGGTCTTTAGCTTCTGC) were purchased from GE-  
574 Dharmacon (Clone ID: TRCN0000122999, Clone ID: TRCN0000123000). HEK293T cells were  
575 co-transfected with shDaam1 and virus packaging plasmids (psPAX2 and pMD2.G) using  
576 Polyethylenimine (PEI). The viral titers were collected starting 24 hours post transfection over  
577 the course of two days and purified using 0.22  $\mu$ m Polyethersulfone (PES) syringe filters.  
578 Infections were carried out in the presence of polybrene. MDCK II cells remained in infection  
579 media for 24 hours, followed by puromycin selection with final concentration of 0.70  $\mu$ g/ml.  
580 Lastly, MDCK II shDaam1 knockdown stable cell lines were validated by Western blotting.

581

## 582 **Western blotting**

583 Western blotting was carried out using published protocols (Kim et al., 2002; Williams et al.,  
584 2017). In short, *Xenopus* embryos were cultured to desired stage and collected. The whole-  
585 embryo lysates were prepared by resuspending 10-20 embryos in a prechilled TX100-lysis  
586 buffer (10 mM HEPES, 150 mM NaCl, 2 mM EDTA, 2 mM EGTA, 0.5% Triton X-100, pH 7.4)  
587 and centrifuged at 18,407 RCF at 4°C for 5 minutes. The resulting protein lysates were  
588 resuspended in an equal volume 2X Laemmli (BioRad,161-0737) + dithiothreitol (Fisher  
589 BioReagents, BP17225) solution, and incubated at 95°C for 2 minutes. For making protein  
590 lysates using MDCK cells, cells were washed with PBS and pelleted by centrifugation at 18,407  
591 RCF at 4°C for 5 minutes. Cell pellets were resuspended in in a prechilled Triton-lysis buffer (50  
592 mM Tris pH 7.4, 1% Triton X-100, 150 mM NaCl, 1 mM EDTA, 1 mM EGTA, 1 mM PMSF, 1 mM  
593 Na<sub>3</sub>VO<sub>4</sub>, 10 mM sodium fluoride, 10 mM  $\beta$ -glycerophosphate, 1 mg/ml aprotinin, and 1 mg/ml  
594 leupeptin). The cell lysates were incubated on ice for 20 minutes, followed by sonication and  
595 centrifugation at 18,407 RCF for 10 minutes at 4°C. Bradford assay was used to determine the

596 total amount of protein in the lysates. The protein samples were run on an 8% SDS-PAGE gel  
597 and transferred to nitrocellulose or polyvinylidene difluoride (PVDF) membranes. The blots were  
598 blocked for at least 1.5 hours at the room temperature using the KPL Detector Block Kit (Sera  
599 Care, 5920-0004, 71-83-00) and probed with primary antibodies overnight at 4°C. The next day,  
600 after series of washes with Tris-buffered saline containing 0.1% Tween 20 (TBST), blots were  
601 incubated with secondary antibodies for at least 1 hour at the room temperature. Protein  
602 expression levels were detected with enhanced chemiluminescence (SuperSignal West Pico  
603 PLUS Chemiluminescent Substrate, Thermo Fisher, 34580) using LiCor and BioRad ChemiDoc  
604 XRS imagers. The following antibodies were used: rabbit anti-Daam1 (1:1000, Proteintech,  
605 14876-1-AP), rabbit anti-Daam1 (1:1000, gift from Dr. Raymond Habas), rabbit anti-GAPDH  
606 (1:1000, Santa Cruz, sc-25778), mouse anti-E-cadherin (1:1000, BD Transduction Laboratories,  
607 610182), rabbit anti-GFP (1:250, ICL Lab, RGFP-45A), anti-rabbit IgG (H + L)-HRP (1:5000,  
608 BioRad, 1706516) and anti-mouse IgG (H + L)-HRP (1:5000, BioRad, 1706516).

609

### 610 **Immunostaining and staining**

611 *Xenopus* embryos were fixed in MEMFA (3.7% formaldehyde, 4 mM MOPS, 2 mM EGTA, and 1  
612 mM MgSO<sub>4</sub>, pH 7.4) for 1 hour at room temperature or overnight at 4°C. Embryos to be stained  
613 with Phalloidin, were fixed using methanol-free formaldehyde (Thermo Scientific, 28908).  
614 Immunostaining was carried out according to previously published methods (Hemmati-Brivanlou  
615 and Melton, 1994; Krneta-Stankic et al., 2010). In short, fixed-embryos were washed 3 times for  
616 15 minutes at room temperature with phosphate buffered saline (PBS) containing 0.1% Triton X-  
617 100 and 0.2% bovine serum albumin (BSA) and blocked using 10% goat serum diluted in PBST  
618 for 1 hour at room temperature. Embryos were incubated with the primary antibodies overnight  
619 at 4°C. The next day, embryos were washed 5 times for 1 hour with PBS-T at room temperature  
620 and then incubated with the secondary antibodies overnight at 4°C. The following day, embryos

621 were washed 3 times for 1hr at room temperature and dehydrated in methanol prior to clearing.  
622 To preserve Phalloidin-labeling, isopropanol was used to dehydrate Phalloidin-stained embryos  
623 (Nworu et al., 2014). Embryos were cleared using BABB (1-part benzyl alcohol: 2-parts benzyl  
624 benzoate) clearing solution and imaged. MDCK cells were fixed in 4% paraformaldehyde (PFA)  
625 for 10 minutes at room temperature. Cultures were washed 3 times with PBS and incubated  
626 with 50mM ammonium chloride for 10 minutes at room temperature to neutralize the PFA. Next,  
627 samples were washed 3 times with PBS and blocked using 10% goat serum/ PBST for 1 hour  
628 and incubated with primary antibodies overnight at 4°C. The following day, MDCK cells were  
629 washed 3 times with PBS and incubated with secondary antibodies for 1 hour at room  
630 temperature. Lastly, stained samples were washed again 3 times with PBS prior to mounting in  
631 Fluoromount-G medium (Southern Biotech, 0100-01) for imaging. The following primary  
632 antibodies were used: chicken anti-GFP (1:250, Abcam, ab13970), rabbit anti-RFP (1:250, MBL  
633 International, PM005), rabbit anti-GFP (1:250, ICL Lab, RGFP-45A), rabbit anti-Lhx1 (1:250, gift  
634 from Dr. Masanori Taira) and mouse anti-E-cadherin (1:100, BD Transduction Laboratories,  
635 610182). For detection of primary antibodies the following secondary antibodies were used:  
636 anti-rabbit IgG Alexa 488 (1:500, Invitrogen, A-11008), anti-rabbit IgG Alexa 555 (1:500,  
637 Invitrogen, A-21428), anti-rabbit IgG Alexa 647 (1:500, Invitrogen, A-21244), anti-mouse IgG  
638 Alexa 488 (1:500, Invitrogen, A-11001), anti-mouse IgG Alexa 555 (1:500, Invitrogen, A-21422),  
639 anti-mouse IgG Alexa 647 (1:500, Invitrogen, A-21235), anti-mouse IgG Alexa 488 (1:500,  
640 Jackson ImmunoResearch, 715-545-150) and anti-chicken IgY Alexa 488 (1:500, Invitrogen, A-  
641 11039). Fluorescent probes used for staining were as follows: FITC-conjugated lectin from  
642 *Erythrina cristagalli* (1:500, Vector labs, FL-1141), Phalloidin-Alexa 568 (embryos- 1:40 and  
643 cells-1:200, Invitrogen, A12380), and diamidino-2-phenylindole (DAPI) (1:500, Thermo  
644 Scientific, 62247).

645

646 **Transmission electron microscopy (TEM)**



647 *Xenopus* embryos were fixed in 2% formaldehyde+0.5% glutaraldehyde (Ted Pella Inc., 18505  
648 and 18426). Fixed embryos were washed with 0.1 M sodium cacodylate buffer and treated with  
649 0.1% Millipore-filtered cacodylate buffered tannic acid. Embryos were post-fixed using 1%  
650 buffered osmium, followed by staining using 1% Millipore-filtered uranyl acetate. Stained  
651 embryos were dehydrated by washing in increasing concentrations of ethanol, permeated, and  
652 embedded in LX-112 medium. After embedding, embryos were placed in a 60°C oven for  
653 approximately 3 days to polymerize. Polymerized samples were sectioned using Leica Ultracut  
654 microtome (Leica, Deerfield, IL). Collected ultrathin sections were stained with uranyl acetate  
655 and lead citrate in a Leica EM Stainer and subjected to imaging.

656

#### 657 **Isolation and live imaging of *Xenopus* kidney cells**

658 Embryos were microinjected with 1ng GFP-Daam1 mRNA into the V2 blastomere, targeting  
659 kidney. Around embryonic NF stage 30, GFP-positive nephrons were surgically dissected under  
660 a fluorescent stereomicroscope using a pair of sharpened forceps (Fisher, NC9404145).  
661 Microsurgical dissections were performed in plastic petri dishes coated with 2% agar containing  
662 Danilchik's for Amy (DFA) solution (53 mM NaCl, 5 mM Na<sub>2</sub>CO<sub>3</sub>, 4.5 mM Potassium Gluconate,  
663 32 mM Sodium Gluconate, 1 mM CaCl<sub>2</sub>, 1 mM MgSO<sub>4</sub>, buffered to pH 8.3 with 1 M bicine )  
664 supplemented with 1 g/l of and Antibiotic antimycotic solution (1:100, Sigma, A5955). To  
665 dissociate into single cells, the isolated nephrons were transferred to fibronectin coated (1µg/ml,  
666 Roche, 10-838-039-001) glass-bottom imaging chambers (Thermo, A7816) prefilled with  
667 Calcium Magnesium Free Media (CMFM) (88 mM NaCl, 1 mM KCl, 2.4 mM NaHCO<sub>3</sub>, 7.5 mM  
668 Tris pH 7.6). After ~30 minutes at the room temperature, as much as possible of the CMFM  
669 media was aspirated from top of the chamber without disturbing the cells. Fresh DFA media was  
670 added and again removed by careful aspiration. In order to ensure complete removal of the

671 CMFM media, this process was repeated at least 5 times. The cells were left undisturbed at the  
672 room temperature for 15-30 minutes prior to imaging.

673

#### 674 **Wound-healing assay**

675 MDCK cells were seeded in 6-well culture plates at a density of 100,000 cells/well and allowed  
676 to reach confluency. Prior to inducing a “wound” or scratch or in a confluent cell monolayer, the  
677 cells were treated with Mitomycin C (10 µg/ml) for 3 hours at 37°C to prevent future proliferation.  
678 A linear scratch was made by gliding the 200 µl sterile tip across the bottom of each well. After  
679 making a scratch, cells were washed with 1X PBS and refed with 5 ml of 10%FBS/DEMEM  
680 supplemented with 1%Antibiotic-antimycotic solution. Samples were placed in 37°C heated  
681 imaging chamber with 5% CO<sub>2</sub> and subjected to time-lapse imaging.

682

#### 683 **Fluorescence Recovery after Photobleaching (FRAP)**

684 To visualize actin dynamics, embryos were injected into V2 blastomere at 8-cell stage with 1 ng  
685 mCherry-UtrCH mRNA along with 20 ng of Daam1 or Standard (control) MO. Injected embryos  
686 were cultured to around NF stage 30. Since the opaqueness of *Xenopus* epithelium prevents  
687 direct *in vivo* imaging of developing nephron at this early embryonic stage, “windowed” embryos  
688 were generated. To make windowed embryos, embryos were anesthetized in 0.04% (0.15%)  
689 Ethyl 3-aminobenzoate methanesulfonate (Sigma, E10521) diluted in DFA. Next, the epithelium  
690 covering developing nephron was surgically removed under fluorescence-dissecting  
691 microscope, exposing developing nephron for *in vivo* imaging. Windowed embryos were  
692 mounted under glass-cover slips and subjected to FRAP. FRAP assays were performed on an  
693 inverted 3i spinning disk microscope integrated to a NIKON TiE with perfect focus and equipped  
694 with Vector™ FRAP scanning module and a Hamamatsu Flash 4.0 camera. Images were  
695 acquired with a NIKON Plan-Apo 60X water 1.2 NA objective. A small fragment at the midpoint

696 of a cell-cell junction was bleached with the 561nm laser line at 100% power. A series of twenty  
697 pre-bleach images were captured and post-bleach recovery was recorded continuously until  
698 fluorescent signal reached a steady state. Movies were analyzed using Slidebook 6.0 and curve  
699 fitting was done with SigmaPlot and GraphPad Prism 8.0 software. For curve fitting, a single  
700 exponential function ( $f(t)=\alpha(1-e^{-kt})$ ), where  $T_{1/2}$  (half-time of recovery) is  $\ln 0.5/(-k)$ , and  $\alpha$  is the  
701 mobile fraction was used. Raw recovery curves were corrected for background and photofading.  
702 Lowest fluorescence signal and the time-point after bleaching were scaled to 0 and curves were  
703 normalized to 1 based on the reference signal before bleaching. Per embryo, between 1 and 5  
704 single junctions were photobleached. To avoid bleaching-induced variation in fluorescence,  
705 junctions picked for photobleaching were spaced far apart. All FRAP experiments have been  
706 carried out using multiple embryos and repeated at least three times.

707

### 708 **Image acquisition and processing**

709 Olympus SZX16 fluorescent stereomicroscope equipped with Olympus DP71 camera was used  
710 for carrying out *Xenopus* microsurgical manipulations, embryo mounts and scoring of kidney  
711 phenotypes in NF stage 40 embryos. Zeiss LSM800 microscope with Airyscan detector,  
712 LeicaSP5 and NikonA1 were used for confocal imaging of fixed and live samples. Captured  
713 images and time-lapse movies were exported as original files and processed using ImageJ (Fiji  
714 plugin). Image panels were built using FigureJ plugin. Final figures were assembled in Adobe  
715 Photoshop CC. TEM imaging was carried out in a JEM 1010 transmission electron microscope  
716 (JEOL, USA, Inc., Peabody, MA) with the AMT Imaging System (Advanced Microscopy  
717 Techniques Corp, Danvers, MA).

718

### 719 **Quantification and statistical analyses**

720 ImageJ (Fiji plugin) software was used for quantitative image analyses. For quantification of E-  
721 cadherin and F-actin staining (**Figures 3, 5 and 6**) images were captured using the same

722 settings. The mean fluorescence intensity along the length of selected junction was measured.  
723 To analyze tissue organization during nephron development (**Figure 3**) cells were manually  
724 counted using the Cell Counter tool. The shortest distance between two neighboring nuclei was  
725 measured using the straight-line selection tool. The area and circularity were measured using  
726 the Analyze Particles tool. Wound area (**Figure 7**) was also measured using the Analyze  
727 Particles tool. To obtain traveled distance, trajectories of randomly selected cells were traced  
728 manually in each frame of the time-lapse using Plugin for Motion Tracking and Analysis  
729 (MTrackJ) (The Biomedical Imaging Group of Erasmus University Medical Centre, Rotterdam,  
730 The Netherlands). All experiments were repeated at least two times, with the exception of TEM  
731 studies, which due to the prohibitive costs of the experiment represent single-trial analyses. The  
732 exact sample size and statistical analysis for each experiment are presented in the  
733 corresponding figure legend. Statistical analyses were carried out using GraphPad Prism 8.0  
734 software.

735  
736  
737

## 738 REFERENCES

739  
740  
741  
742

Adams, C.L., Chen, Y.T., Smith, S.J., and Nelson, W.J. (1998). Mechanisms of epithelial cell-cell adhesion and cell compaction revealed by high-resolution tracking of E-cadherin-green fluorescent protein. *J. Cell Biol.* *142*, 1105–1119.

743  
744

Ang, S.F., Zhao, Z.S., Lim, L., and Manser, E. (2010). DAAM1 is a formin required for centrosome re-orientation during cell migration. *PLoS One* *5*, e13064.

745  
746

Becker, B.E., and Gard, D.L. (2006). Visualization of the Cytoskeleton in *Xenopus* Oocytes and Eggs by Confocal Immunofluorescence Microscopy. In *Methods Mol Biol.*, pp. 69–86.

747  
748

Burkel, B.M., von Dassow, G., and Bement, W.M. (2007). Versatile fluorescent probes for actin filaments based on the actin-binding domain of utrophin. *Cell Motil. Cytoskeleton* *64*, 822–832.

749  
750  
751

Cai, D., Chen, S.-C., Prasad, M., He, L., Wang, X., Choessel-Cadamuro, V., Sawyer, J.K., Danuser, G., and Montell, D.J. (2014). Mechanical feedback through E-cadherin promotes direction sensing during collective cell migration. *Cell* *157*, 1146–1159.

752  
753

Campbell, K., and Casanova, J. (2015). A role for E-cadherin in ensuring cohesive migration of a heterogeneous population of non-epithelial cells. *Nat. Commun.* *6*, 7998.

754  
755

Campbell, K., and Casanova, J. (2016). A common framework for EMT and collective cell migration. *Dev.* *143*, 4291–4300.

756

Capaldo, C.T., and Macara, I.G. (2007). Depletion of E-Cadherin Disrupts Establishment but

- 757 Not Maintenance of Cell Junctions in Madin-Darby Canine Kidney Epithelial Cells. *Mol. Biol. Cell*  
758 *18*, 189–200.
- 759 Castelli, M., Boca, M., Chiaravalli, M., Ramalingam, H., Rowe, I., Distefano, G., Carroll, T., and  
760 Boletta, A. (2013). Polycystin-1 binds Par3/aPKC and controls convergent extension during  
761 renal tubular morphogenesis. *Nat. Commun.* *4*, 1–10.
- 762 Cavey, M., Rauzi, M., Lenne, P.F., and Lecuit, T. (2008). A two-tiered mechanism for  
763 stabilization and immobilization of E-cadherin. *Nature* *453*, 751–756.
- 764 Cohen, D.J., Gloerich, M., and Nelson, W.J. (2016). Epithelial self-healing is recapitulated by a  
765 3D biomimetic E-cadherin junction. *Proc. Natl. Acad. Sci. U. S. A.* *113*, 14698–14703.
- 766 Collins, C., Denisin, A.K., Pruitt, B.L., and Nelson, W.J. (2017). Changes in E-cadherin rigidity  
767 sensing regulate cell adhesion. *Proc. Natl. Acad. Sci. U. S. A.* *114*, E5835–E5844.
- 768 Combes, A.N., Davies, J.A., and Little, M.H. (2015). Cell-cell interactions driving kidney  
769 morphogenesis. *Curr. Top. Dev. Biol.* *112*, 467–508.
- 770 Corkins, M.E., Hanania, H.L., Krneta-Stankic, V., Delay, B.D., Pearl, E.J., Lee, M., Ji, H.,  
771 Davidson, A.J., Horb, M.E., and Miller, R.K. (2018). Transgenic *Xenopus laevis* line for in vivo  
772 labeling of nephrons within the kidney. *Genes (Basel)*. *9*, 197.
- 773 Corkins, M.E., Krneta-Stankic, V., Kloc, M., McCrea, P.D., Gladden, A.B., and Miller, R.K.  
774 (2019). Divergent roles of the Wnt/PCP Formin Daam1 in renal ciliogenesis. *PLoS One* *14*,  
775 e0221698.
- 776 Davidson, L.A., Marsden, M., Keller, R., and DeSimone, D.W. (2006). Integrin  $\alpha5\beta1$  and  
777 Fibronectin Regulate Polarized Cell Protrusions Required for *Xenopus* Convergence and  
778 Extension. *Curr. Biol.* *16*, 833–844.
- 779 DeLay, B.D., Krneta-Stankic, V., and Miller, R.K. (2016). Technique to Target Microinjection to  
780 the Developing *Xenopus* Kidney. *J. Vis. Exp.* *111*.
- 781 DeLay, B.D., Corkins, M.E., Hanania, H.L., Salanga, M., Deng, J.M., Sudou, N., Taira, M., Horb,  
782 M.E., and Miller, R.K. (2018). Tissue-Specific Gene Inactivation in *Xenopus laevis*: Knockout of  
783 *Ihx1* in the Kidney with CRISPR/Cas9. *Genetics* *208*, 673–686.
- 784 Friedl, P., and Mayor, R. (2017). Tuning Collective Cell Migration by Cell–Cell Junction  
785 Regulation. *Cold Spring Harb. Perspect. Biol.* 1–17.
- 786 Grikscheit, K., and Grosse, R. (2016). Formins at the Junction. *Trends Biochem. Sci.* *41*, 148–  
787 159.
- 788 Habas, R., Kato, Y., and He, X. (2001). Wnt/Frizzled activation of Rho regulates vertebrate  
789 gastrulation and requires a novel Formin homology protein Daam1. *Cell* *107*, 843–854.
- 790 Hemmati-Brivanlou, A., and Melton, D.A. (1994). Inhibition of activin receptor signaling  
791 promotes neuralization in *Xenopus*. *Cell* *77*, 273–281.
- 792 Higashi, T., Stephenson, R.E., and Miller, A.L. (2019). Comprehensive analysis of formin  
793 localization in *Xenopus* epithelial cells. *Mol. Biol. Cell* *30*, 82–95.
- 794 Huebner, R.J., and Wallingford, J.B. (2018). Coming to Consensus: A Unifying Model Emerges  
795 for Convergent Extension. *Dev. Cell* *46*, 389–396.
- 796 Huebner, R.J., Malmi-kakkada, A.N., Sarikaya, S., Weng, S., and Wallingford, J.B. (2020).  
797 Cadherin clustering controls heterogeneous, asymmetric junction dynamics during vertebrate  
798 axis elongation. *BioRxiv* 2020.02.11.944033.
- 799 Indra, I., Choi, J., Chen, C.S., Troyanovsky, R.B., Shapiro, L., Honig, B., and Troyanovsky, S.M.  
800 (2018). Spatial and temporal organization of cadherin in punctate adherens junctions. *Proc.*

- 801 Natl. Acad. Sci. U. S. A. *115*, E4406–E4415.
- 802 Jaiswal, R., Breitsprecher, D., Collins, A., Corrêa, I.R., Xu, M.Q., and Goode, B.L. (2013). The  
803 formin daam1 and fascin directly collaborate to promote filopodia formation. *Curr. Biol.* *23*,  
804 1373–1379.
- 805 Kamei, C.N., Gallegos, T.F., Liu, Y., Hukriede, N., and Drummond, I.A. (2019). Wnt signaling  
806 mediates new nephron formation during zebrafish kidney regeneration. *Dev.* *146*.
- 807 Karner, C.M., Chirumamilla, R., Aoki, S., Igarashi, P., Wallingford, J.B., and Carroll, T.J. (2009).  
808 Wnt9b signaling regulates planar cell polarity and kidney tubule morphogenesis. *Nat. Genet.* *41*,  
809 793–799.
- 810 Kawabata Galbraith, K., Fujishima, K., Mizuno, H., Lee, S.J., Uemura, T., Sakimura, K.,  
811 Mishina, M., Watanabe, N., and Kengaku, M. (2018). MTSS1 Regulation of Actin-Nucleating  
812 Formin DAAM1 in Dendritic Filopodia Determines Final Dendritic Configuration of Purkinje Cells.  
813 *Cell Rep.* *24*, 95-106.e9.
- 814 Kida, Y.S., Sato, T., Miyasaka, K.Y., Suto, A., and Ogura, T. (2007). Daam1 regulates the  
815 endocytosis of EphB during the convergent extension of the zebrafish notochord. *Proc. Natl.*  
816 *Acad. Sci. U. S. A.* *104*, 6708–6713.
- 817 Kim, H.Y., and Davidson, L.A. (2013). Microsurgical Approaches to Isolate Tissues from  
818 *Xenopus* Embryos for Imaging Morphogenesis. *Cold Spring Harb Protoc* 362–365.
- 819 Kim, S.W., Fang, X., Ji, H., Paulson, A.F., Daniel, J.M., Ciesiolka, M., van Roy, F., and McCrea,  
820 P.D. (2002). Isolation and Characterization of XKaiso, a Transcriptional Repressor That  
821 Associates with the Catenin Xp120 ctn in *Xenopus laevis*. *J. Biol. Chem.* *277*, 8202–8208.
- 822 Krneta-Stankic, V., Sabillo, A., and Domingo, C.R. (2010). Temporal and spatial patterning of  
823 axial myotome fibers in *Xenopus laevis*. *Dev. Dyn.* *239*, 1162–1177.
- 824 Kunimoto, K., Bayly, R.D., Vldar, E.K., Vonderfecht, T., Gallagher, A.R., and Axelrod, J.D.  
825 (2017). Disruption of Core Planar Cell Polarity Signaling Regulates Renal Tubule  
826 Morphogenesis but Is Not Cystogenic. *Curr. Biol.* *27*, 3120-3131.e4.
- 827 Lefevre, J.G., Chiu, H.S., Combes, A.N., Vanslambrouck, J.M., Ju, A., Hamilton, N.A., and Little,  
828 M.H. (2017). Self-organisation after embryonic kidney dissociation is driven via selective  
829 adhesion of ureteric epithelial cells. *Dev.* *144*, 1087–1096.
- 830 Li, D., Hallett, M. a, Zhu, W., Rubart, M., Liu, Y., Yang, Z., Chen, H., Haneline, L.S., Chan, R.J.,  
831 Schwartz, R.J., et al. (2011). Dishevelled-associated activator of morphogenesis 1 (Daam1) is  
832 required for heart morphogenesis. *Development* *138*, 303–315.
- 833 Li, J.X.H., Tang, V.W., and Brieher, W.M. (2020). Actin protrusions push at apical junctions to  
834 maintain E-cadherin adhesion. *Proc. Natl. Acad. Sci. U. S. A.* *117*, 432–438.
- 835 Lienkamp, S.S., Liu, K., Karner, C.M., Carroll, T.J., Ronneberger, O., Wallingford, J.B., and  
836 Walz, G. (2012). Vertebrate kidney tubules elongate using a planar cell polarity-dependent,  
837 rosette-based mechanism of convergent extension. *Nat. Genet.* *44*, 1382–1387.
- 838 Liu, W., Sato, A., Khadka, D., Bharti, R., Diaz, H., Runnels, L.W., and Habas, R. (2008).  
839 Mechanism of activation of the Formin protein Daam1. *Proc. Natl. Acad. Sci. U. S. A.* *105*, 210–  
840 215.
- 841 Lu, J., Meng, W., Poy, F., Maiti, S., Goode, B.L., and Eck, M.J. (2007). Structure of the FH2  
842 Domain of Daam1: Implications for Formin Regulation of Actin Assembly. *J. Mol. Biol.* *369*,  
843 1258–1269.
- 844 Marciano, D.K., Brakeman, P.R., Lee, C., Spivak, N., Eastburn, D.J., Bryant, D.M., Iii, G.M.B.,

- 845 Hofmann, I., Mostov, K.E., Reichardt, L.F., et al. (2011). P120 catenin is required for normal  
846 renal tubulogenesis and glomerulogenesis. *Development* 138, 2099–2109.
- 847 McMahon, A.P. (2016). Development of the Mammalian Kidney. *Curr. Top. Dev. Biol.* 31–64.
- 848 Mendonsa, A.M., Na, T.Y., and Gumbiner, B.M. (2018). E-cadherin in contact inhibition and  
849 cancer. *Oncogene* 37, 4769–4780.
- 850 Miller, R.K., and McCrea, P.D. (2009). Wnt to build a tube: Contributions of Wnt signaling to  
851 epithelial tubulogenesis. *Dev. Dyn.* 239, NA-NA.
- 852 Miller, R.K., Gomez de la Torre Canny, S., Jang, C.-W., Cho, K., Ji, H., Wagner, D.S., Jones,  
853 E.A., Habas, R., and McCrea, P.D. (2011). Pronephric Tubulogenesis Requires Daam1-  
854 Mediated Planar Cell Polarity Signaling. *J. Am. Soc. Nephrol.* 22, 1654–1664.
- 855 Moody, S.A., and Kline, M.J. (1990). Segregation of fate during cleavage of frog (*Xenopus*  
856 *laevis*) blastomeres. *Anat. Embryol. (Berl.)* 182, 347–362.
- 857 Nagy, I.I., Xu, Q., Naillat, F., Ali, N., Miinalainen, I., Samoylenko, A., and Vainio, S.J. (2016).  
858 Impairment of Wnt11 function leads to kidney tubular abnormalities and secondary glomerular  
859 cystogenesis. *BMC Dev. Biol.* 16, 1–14.
- 860 Nieuwkoop, P.D., and Faber, J. (1994). Normal table of *Xenopus laevis* (Daudin) : a  
861 systematical and chronological survey of the development from the fertilized egg till the end of  
862 metamorphosis (New York: Garland Publishing, Inc.).
- 863 Nishimura, T., Honda, H., and Takeichi, M. (2012). Planar cell polarity links axes of spatial  
864 dynamics in neural-tube closure. *Cell* 149, 1084–1097.
- 865 Nishimura, T., Ito, S., Saito, H., Hiver, S., Shigetomi, K., Ikenouchi, J., and Takeichi, M. (2016).  
866 DAAM1 stabilizes epithelial junctions by restraining WAVE complex-dependent lateral  
867 membrane motility. *J. Cell Biol.* 215, 559–573.
- 868 Nworu, C.U., Krieg, P.A., and Gregorio, C.C. (2014). Preparation of developing *Xenopus* muscle  
869 for sarcomeric protein localization by high-resolution imaging. *Methods* 66, 370–379.
- 870 O'Brien, L.L., Combes, A.N., Short, K.M., Lindström, N.O., Whitney, P.H., Cullen-McEwen, L.A.,  
871 Ju, A., Abdelhalim, A., Michos, O., Bertram, J.F., et al. (2018). Wnt11 directs nephron progenitor  
872 polarity and motile behavior ultimately determining nephron endowment. *Elife* 7, 1–25.
- 873 Saxen, L. (1987). *Organogenesis of the Kidney* (Cambridge University Press).
- 874 Shindo, A., and Wallingford, J.B. (2014). PCP and septins compartmentalize cortical actomyosin  
875 to direct collective cell movement. *Science* 343, 649–652.
- 876 Sive, H.L., Grainger, R.M., and Harland, R.M. (2000). *Early development of Xenopus laevis : a*  
877 *laboratory manual* (Cold Spring Harbor Press, Cold Spring Harbor, NY, USA: Cold Spring  
878 Harbor Laboratory Press).
- 879 Strickland, L., Von Dassow, G., Ellenberg, J., Foe, V., Lenart, P., and Burgess, D. (2004). Light  
880 microscopy of echinoderm embryos. *Methods Cell Biol.* 2004, 371–409.
- 881 Tada, M., and Heisenberg, C.P. (2012). Convergent extension: using collective cell migration  
882 and cell intercalation to shape embryos. *Development* 139, 3897–3904.
- 883 Takeichi, M. (2014). Dynamic contacts: Rearranging adherens junctions to drive epithelial  
884 remodelling. *Nat. Rev. Mol. Cell Biol.* 15, 397–410.
- 885 Venegas-FERRÍN, M., Sudou, N., Taira, M., and Del Pino, E.M. (2010). Comparison of Lim1  
886 expression in embryos of frogs with different modes of reproduction. *Int. J. Dev. Biol.* 54, 195–  
887 202.

- 888 Vestweber, D., Kemler, R., and Ekblom, P. (1985). Cell-adhesion molecule uvomorulin during  
889 kidney development. *Dev. Biol.* *112*, 213–221.
- 890 Vize, P.D., Carroll, T.J., and Wallingford, J.B. (2003). Induction, Development, and Physiology  
891 of the Pronephric Tubules. In *The Kidney*, P.D. Vize, A.S. Woolf, and J.B.L. Bard, eds. (San  
892 Diego: Elsevier), pp. 19–50.
- 893 Williams, E., Villar-Prados, A., Bowser, J., Broaddus, R., and Gladden, A.B. (2017). Loss of  
894 polarity alters proliferation and differentiation in low-grade endometrial cancers by disrupting  
895 Notch signaling. *PLoS One* *12*, e0189081.
- 896 Yamashita, M., Higashi, T., Suetsugu, S., Sato, Y., Ikeda, T., Shirakawa, R., Kita, T., Takenawa,  
897 T., Horiuchi, H., Fukai, S., et al. (2007). Crystal structure of human DAAM1 formin homology 2  
898 domain. *Genes Cells* *12*, 1255–1265.
- 899 Yap, A.S., Gomez, G.A., and Parton, R.G. (2015). Adherens Junctions Revisualized: Organizing  
900 Cadherins as Nanoassemblies. *Dev. Cell* *35*, 12–20.
- 901



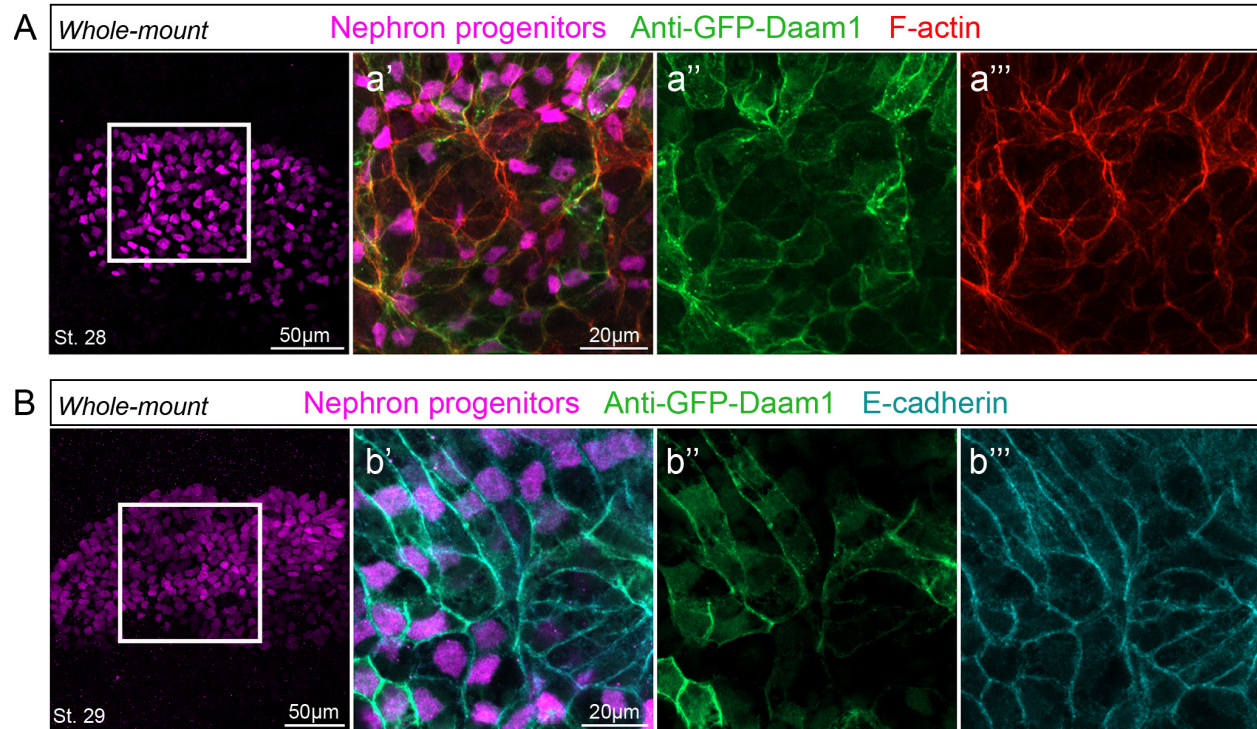

**Figure 1. Daam1 co-localizes with junctional F-actin and E-cadherin during early nephron development**

Confocal maximum image projections of whole-mount immunostaining of *Xenopus* nephric primordium labeled by Lhx1(magenta) and GFP to visualize Daam1 (green) in conjunction with, (A) Phalloidin staining to visualize F-actin (red) or (B) E-cadherin (cyan). a'-a''' and b'-b''' represent close-up images of white boxes.

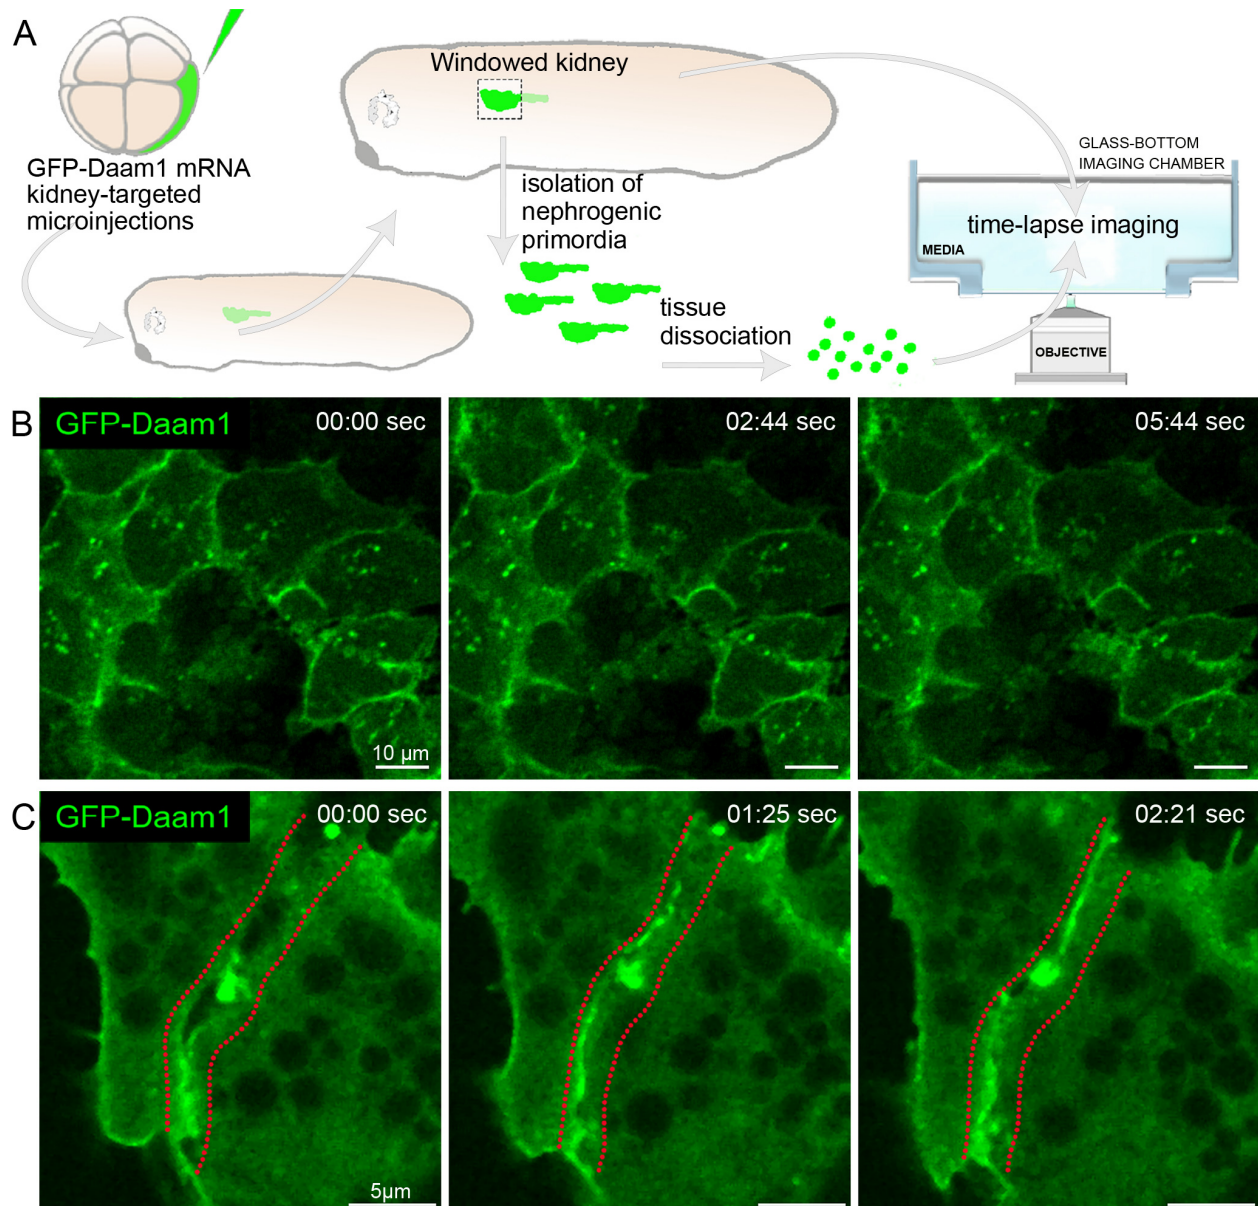

**Figure 2. Daam1 localizes to newly formed cell-cell contacts**

(A) Schematic illustration showing steps involved in preparation of “windowed kidney” embryos and primary cultures expressing GFP-Daam1. Please note that for clarity of illustration the 8-cell GFP-Daam1 injected *Xenopus* blastomere is fate-mapped strictly to the nephric primordium and that blastomere also contributes to epidermis, ventral and dorsal somites, hindgut, proctodeum and trunk neural crest cells (DeLay et al., 2016; Moody and Kline, 1990).

(B) Time-lapse imaging montage of the nephric primordium expressing GFP-Daam1 in “windowed kidney” embryos. Elapsed time is indicated at the top in seconds; see [Video S1](#).

(C) Time-lapse imaging montage shows cells isolated from a developing nephron expressing GFP-Daam1 mRNA adhering with each other. Elapsed time is indicated at the top in seconds. The border arising between two cells is delineated by the red dotted line; see [Video S2](#).

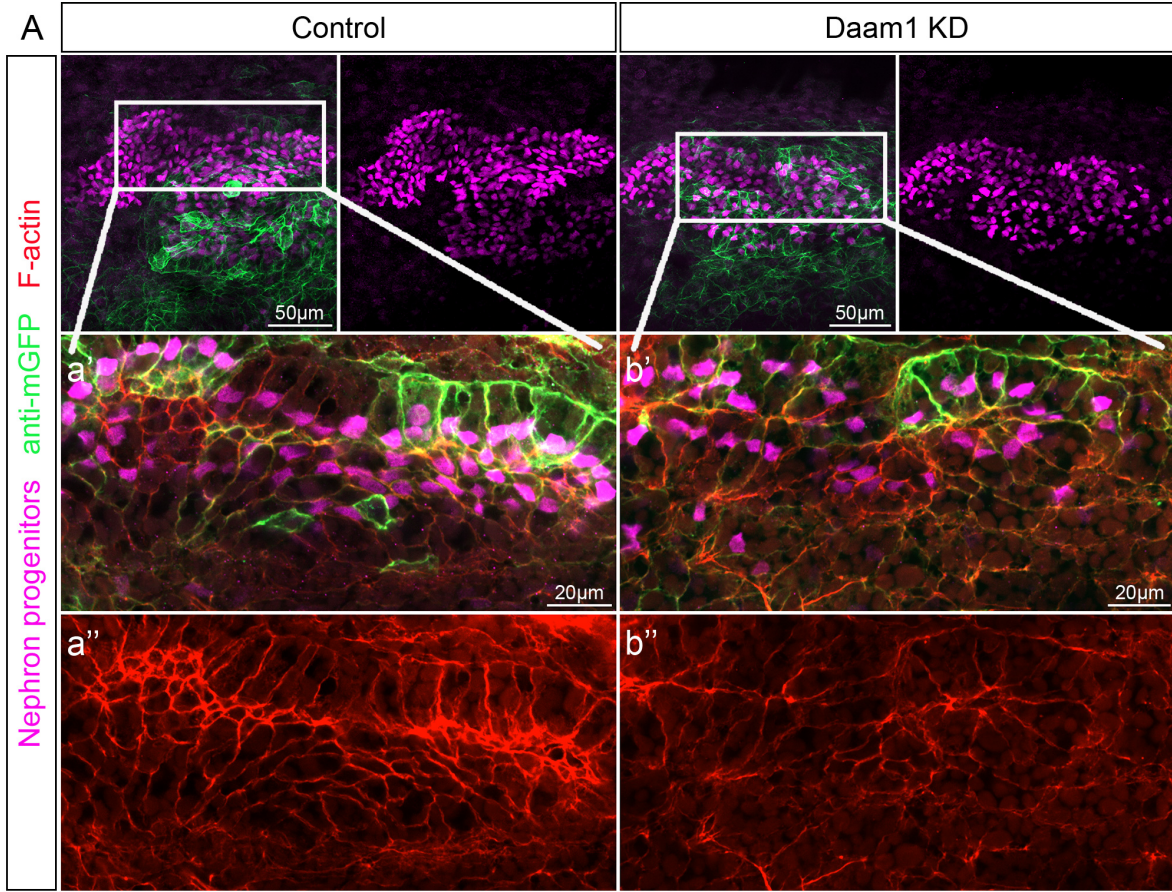

**B**

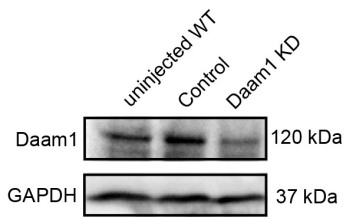

**C**

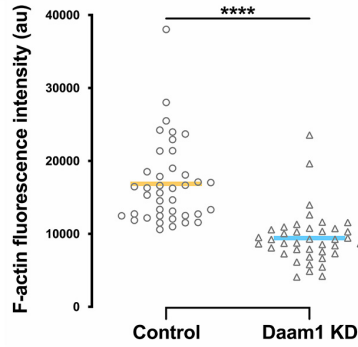

**D**

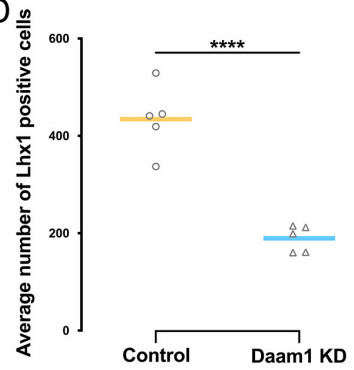

**E**

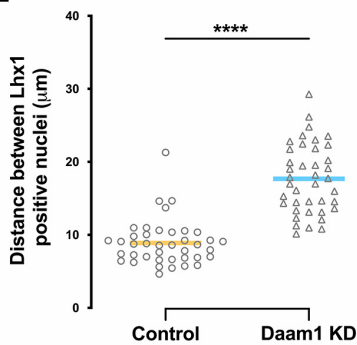

**F**

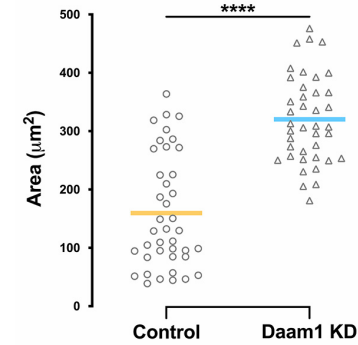

**G**

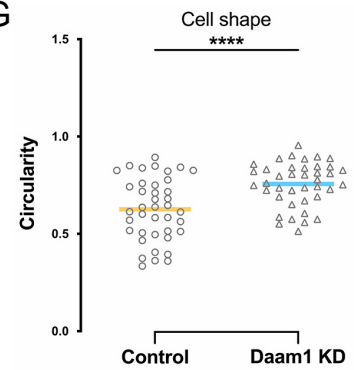

### Figure 3. Effects of Daam1 depletion on the nephrogenic primordium

(A) Maximum projection confocal images of F-actin expression (red) in nephric primordium (magenta) in Control and Daam1 knockdown embryos. a-a'' and b'-b'' represent close-up images of the corresponding regions in white boxes; see [Videos S3 and S4](#).

(B) Western blot showing Daam1 and GAPDH (control) protein levels for uninjected wild type (WT) and Control (Standard morpholino) and Daam1 KD (Daam1 morpholino) injected embryos.

(C) The graph showing the relative fluorescence intensity levels of junctional F-actin in the nephric primordia of Control and Daam1 KD embryos.  $N_{\text{Control}}=40$  junctions on 2 embryos and  $N_{\text{Daam1 KD}}=40$  junctions on 2 embryos. \*\*\*\* $P < 0.0001$  analyzed by unpaired t-test.

(D-G) Morphometric analyses of Control and Daam1-depleted nephric primordia. The thick bars represent the mean, \*\*\*\* $P < 0.0001$  analyzed by unpaired t-test, (E-G)  $N_{\text{Control}}=40$  junctions on 2 embryos and  $N_{\text{Daam1 KD}}=40$  junctions on 2 embryos. Graphs showing comparison between Control and Daam1-depleted nephric primordia of,

(D) the average number of Lhx1-positive nephron progenitors where  $N_{\text{Control}}=5$  embryos and  $N_{\text{Daam1KD}}=5$  embryos,

(E) the relative distance between nearest neighbors of Lhx1-positive nuclei,

(F) the relative cell area and

(G) the relative circularity, where 1 represents the perfect circle.

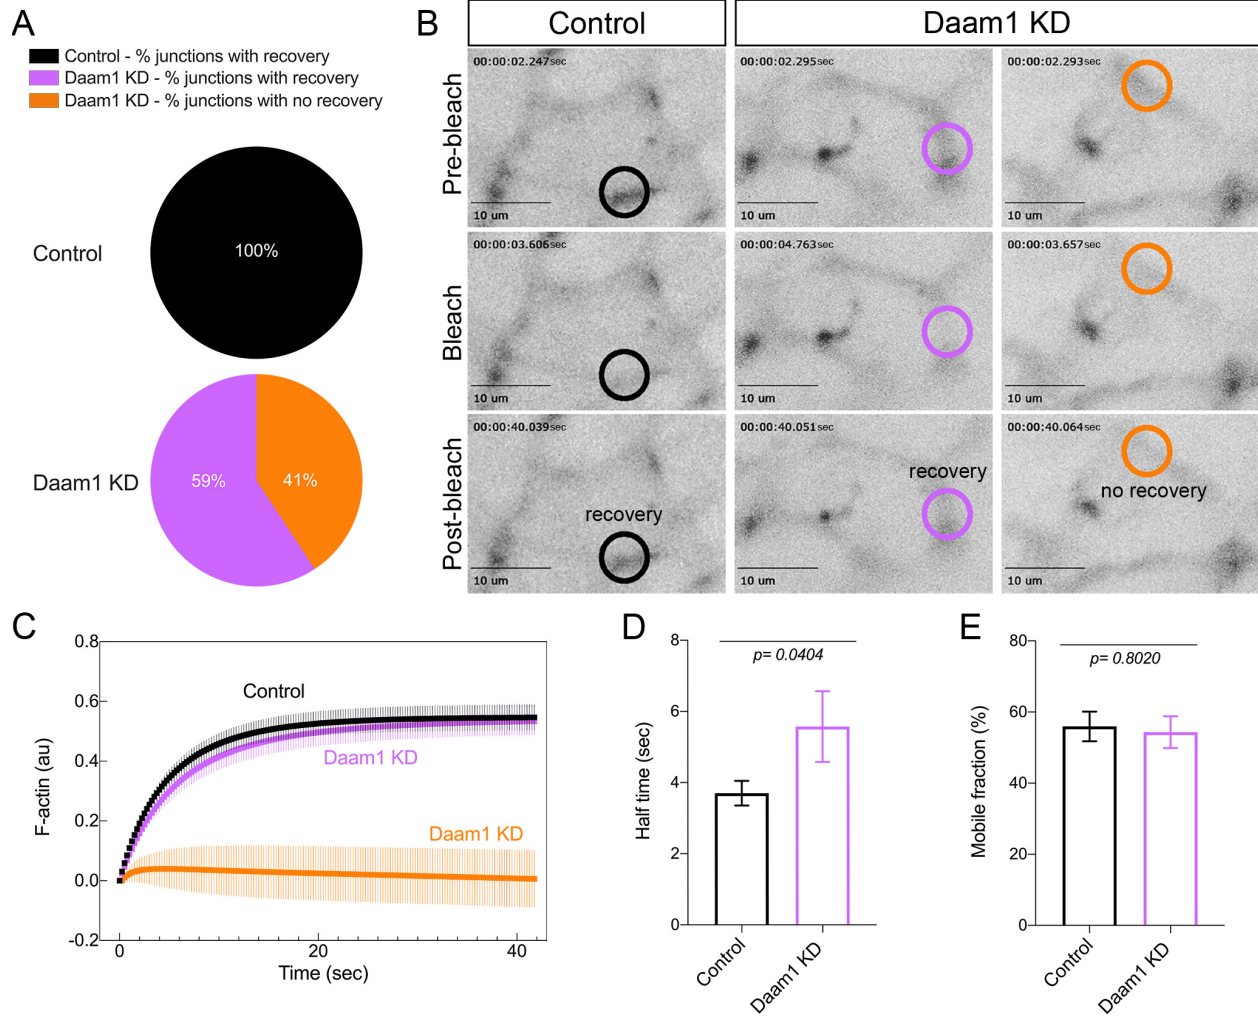

#### Figure 4. Daam1 regulates assembly of junctional F-actin in developing nephron

F-actin dynamics at cell-cell junctions of Control and Daam1-depleted developing nephrons expressing mCherry-Utrophin were assessed using FRAP.

(A) Percentage of junctions showing recovery of fluorescence after bleaching in Control (black,  $N_{total}=27$  junctions, 1-5 junctions/embryo) and Daam1 KD (purple and orange,  $N_{total}=27$  junctions, 1-5 junctions/embryo) nephrons.

(B) Typical time-lapse images of Control and Daam1-depleted cell junctions before and after photobleaching. In each image, the bleached region is highlighted with a circle (black - Control junction showing recovery, purple - Daam1 KD junction showing recovery and orange - Daam1 KD junction showing no-recovery of fluorescence after photobleaching).

(C) Graph shows average recovery curves obtained from individual best-fit plots for Control (black), Daam1 KD junctions with (purple) and without (orange) recovery of fluorescence after photobleaching.

(D-E) Bar graphs comparing Control and Daam1 KD profiles calculated from individual best-fit curves for Control (black) and Daam1 KD junctions with recovery of fluorescence after photobleaching (purple). Data represent the mean  $\pm$  S.E. from three independent experiments. P-values were analyzed by unpaired t-test.

(D) Bar graph of the relative half-times for F-actin.

(E) Bar graph of the relative mobile fraction for F-actin.

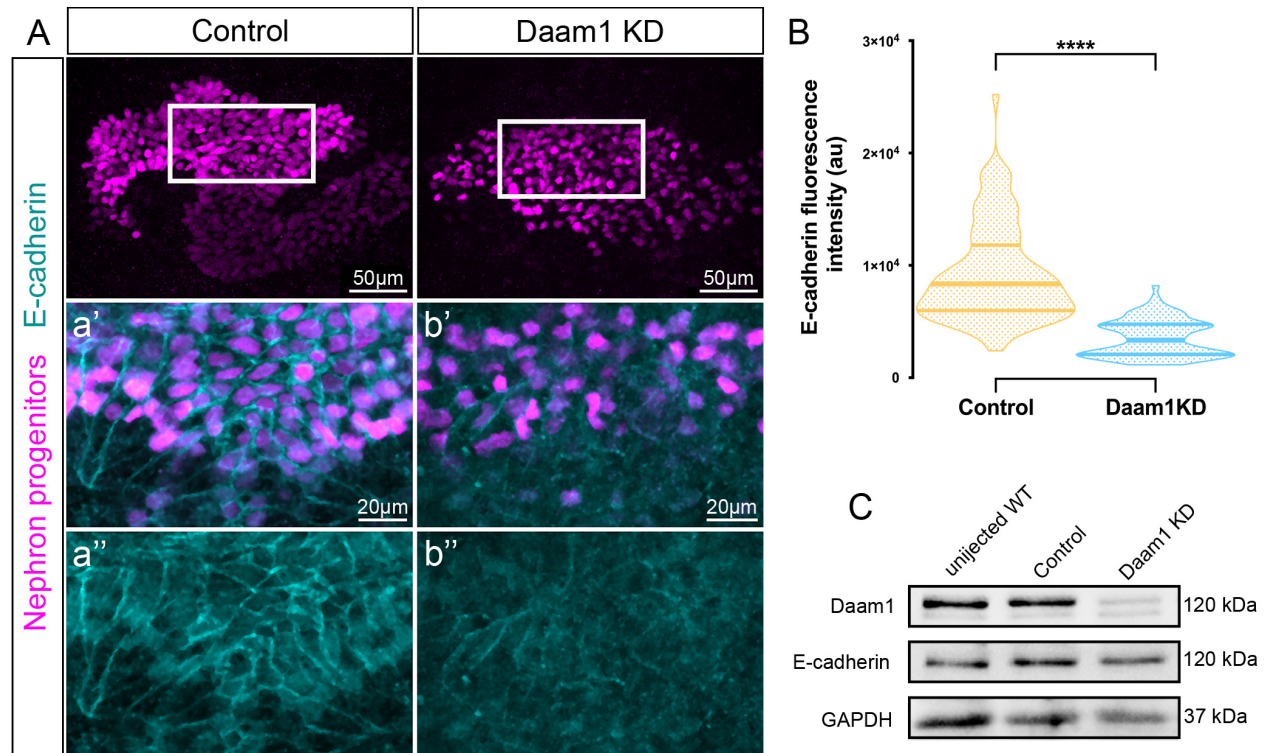

**Figure 5. Daam1 promotes localization of junctional E-cadherin**

(A) Maximum projection confocal images of E-cadherin expression (cyan) in nephric primordium (magenta) in Control and Daam1 KD embryos a-a' and b-b' represent the close-up images of corresponding regions in white boxes.

(B) Violin plots depicting the relative fluorescence intensity of junctional E-cadherin in the nephric primordia of Control (orange) and Daam1 KD (blue).  $N_{\text{Control}}=88$  junctions on 4 embryos and  $N_{\text{Daam1 KD}}=84$  junctions on 4 embryos. Center-lines represents median; Limits show 1<sup>st</sup> and 3<sup>rd</sup> quartile. \*\*\*\* $P<0.0001$  analyzed by unpaired t-test.

(C) Western blot showing Daam1, E-cadherin and GAPDH (control) protein levels in uninjected wild type (WT) and Control (Standard morpholino) and Daam1 KD (Daam1 morpholino) injected embryos.

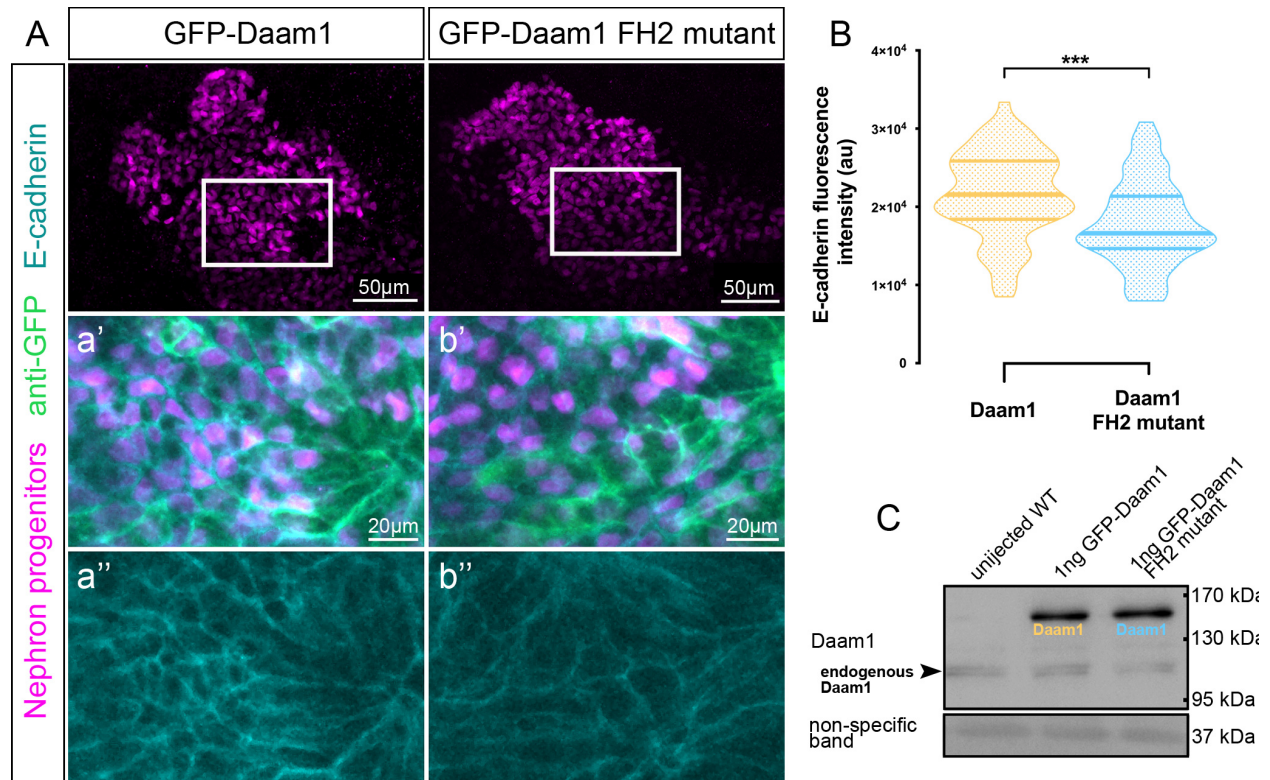

**Figure 6. E-cadherin localization to cell-cell junctions is mediated by FH2 domain of Daam1**

(A) Maximum projection confocal images showing E-cadherin staining (cyan) in nephric primordium (magenta) expressing GFP-Daam1 or GFP-Daam1 FH2 mutant mRNA. a-a' and b-b' represent close-up images of corresponding regions in white boxes.

(B) Violin plots depicting the relative fluorescence intensity of junctional E-cadherin in the nephric primordia expressing GFP-Daam1 (orange) and GFP-Daam1 FH2 mutant (blue) mRNA.  $N_{\text{Daam1}}=60$  junctions on 3 embryos and  $N_{\text{Daam1FH2mutant}}=55$  junctions on 3 embryos. Center-lines represents median; Limits show 1<sup>st</sup> and 3<sup>rd</sup> quartile. \*\*\* $P<0.0002$  analyzed by unpaired t-test.

(C) Western blot showing the exogenous and endogenous protein levels of Daam1 in uninjected wild type (WT) embryos, embryos injected with 1 ng of GFP-Daam1 mRNA and 1ng GFP-Daam1 FH2 mutant mRNA. The non-specific band confirms equal loading.

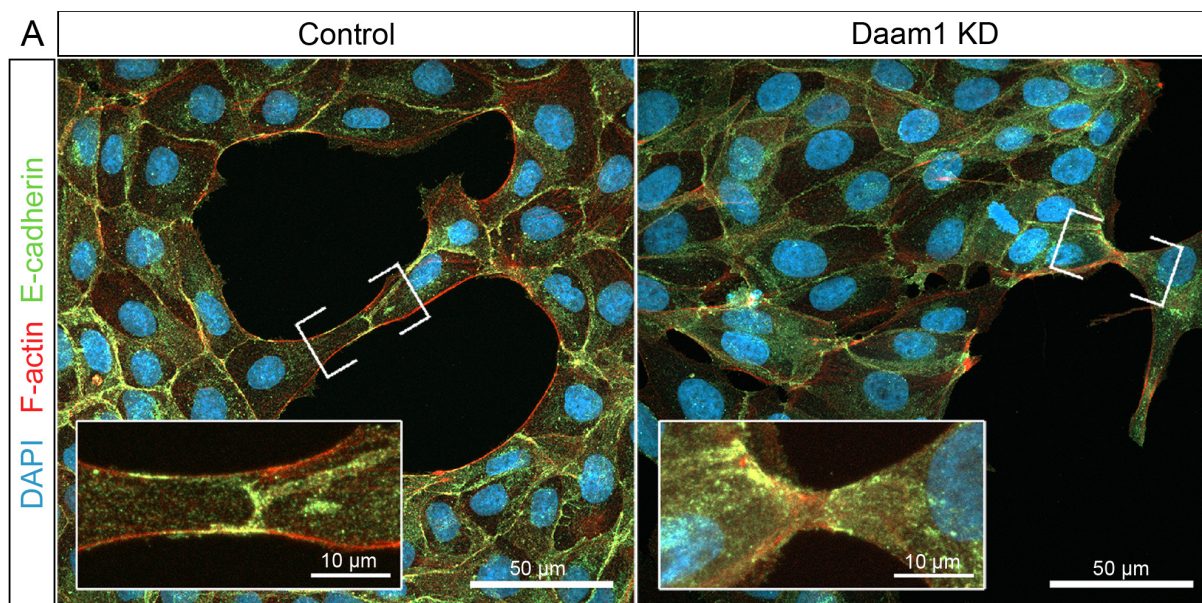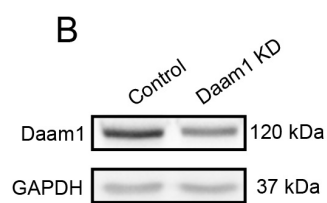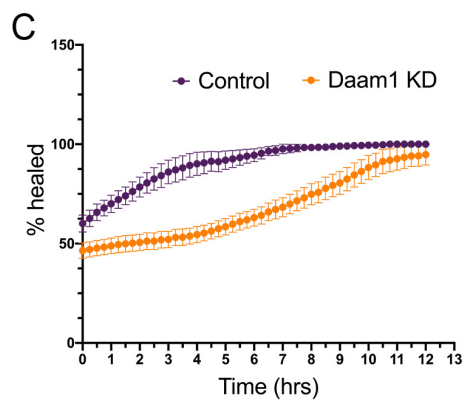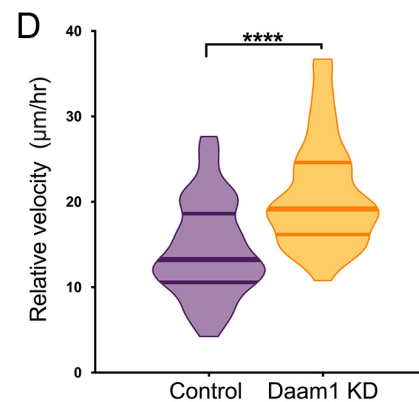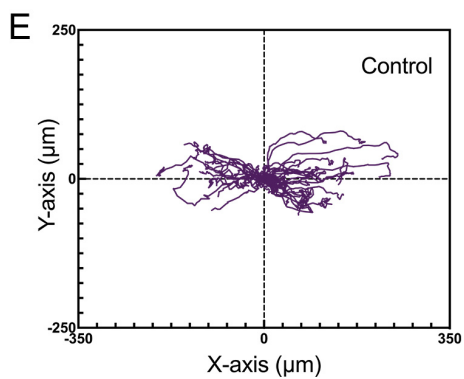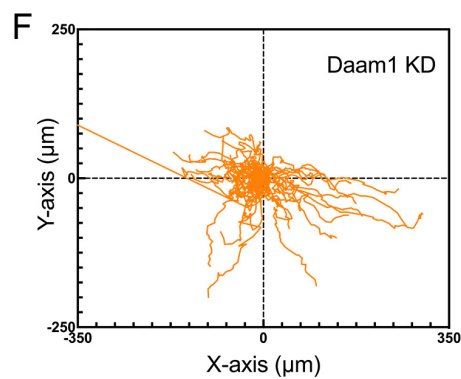



**Figure 7. Daam1- depleted MDCK cells display compromised localization of E-cadherin at cell-cell contacts and impaired cohesion during collective movement**

(A) E-cadherin (green), F-actin (red) and DAPI (blue) in subconfluent the MDCK Control and shDaam1 knockdown cells. E-cadherin localization in the nascent cell-cell contacts (marked by white brackets and shown enlarged in corresponding white boxes) is impaired in shDaam1- deficient cells.

(B) Western blot analysis of Daam1 and GAPDH protein levels in the MDCK Control and shDaam1 knockdown cells.

(C-F) Summary of the wound-healing experiments for the MDCK Control and Daam1 KD cells, [see Video S7](#).

(C) Daam1 depletion impairs wound closure. The graph represents the percent of the wound surface area over time for Control (purple) and Daam1 KD (orange) cells. Error bars indicate S.E. of the mean on 4 assays.

(D-F) Manually tracking migration paths of single-cells during the wound closure demonstrates that Daam1 organizes collective movement of the MDCK epithelial monolayers by modulating the speed and directionality of individual cells. Depletion of Daam1 results in increased velocity and random migration.  $N_{\text{Control}}=52$  cells from 4 assays and  $N_{\text{Daam1 KD}}=42$  cells tracked from 4 assays. Cells were tracked in 15 minutes increments for 12 hours.

(D) Violin plots represent migration velocity calculated from tracking traveled distances of single cells for Control and Daam1 KD cells. Center-lines represents median; Limits show 1<sup>st</sup> and 3<sup>rd</sup> quartile. \*\*\* $P<0.0001$  analyzed by unpaired t-test.

(E) Wind-rose plot showing migration tracks of individual Control cells.

(F) Wind-rose plot showing migration tracks of Daam1 KD cells.
